# Supplementary material for: Ethical and Inclusive Artificial Intelligence for Sustainable Knowledge Societies: A Global Governance Framework through a Systematic Literature Review
Source: Research Square preprint supplement (doi:10.21203/rs.3.rs-8230657/v1), 2025-12-24
Supplement: Supplementary file 1 [file 91f41e4c9fa14bcf02559232.docx]

# APPENDIX B

## Matrix A. ****Distribution of Included Studies by Research Design and Methodology**.** These categories are grouped to combine similar types of studies

| **Research Design / Methodology** | Count (%) | Example  (Article ID) |
| --- | --- | --- |
| Conceptual / Normative / Philosophical (Termasuk: conceptual, normative, ethical essay, perspective, commentary) | 38 (30%) | S39, S66, S83, S87, S132 |
| Review (Includes: literature review, systematic review, scoping review, domain review) | 17 (13%) | S011, S037, S065, S114, S126 |
| Empirical - Qualitative (Includes: qualitative, case study, interviews, co-design) | 16 (13%) | S014, S022, S046, S095, S125 |
| Empirical - Quantitative (Includes: quantitative, survey, large-scale analysis) | 11 (9%) | S025, S057, S081, S099, S121 |
| Policy / Legal Analysis (Includes: policy analysis, legal review, guidelines) | 11 (9%) | S016, S021, S029, S060, S084 |
| Conference Proceeding / Paper | 7 (6%) | S004, S076, S093, S119, S127 |
| Mixed Methods | 5 (4%) | S020, S023, S033, S080, S018 |
| Book Chapter / Monograph | 5 (4%) | S068, S073, S078, S097, S104 |
| Empirical - Experimental / Protocol | 4 (3%) | S008, S048, S090, S031 |
| Framework / Proposal Model | 4 (3%) | S010, S017, S062, S091 |
| Tutorial / Applied Guidance | 3 (2%) | S052, S094, S112 |
| Panel / Workshop / Roundtable Report | 2 (2%) | S034, S071 |
| Other (Analytical essay, Thought experiment) | 2 (2%) | S059, S130 |
| Generic | 2 (2%) | S007, S069 |

## Matrix B. ****Geographical Focus and Scope of the Included Studies.**** Countries that appear frequently are grouped, while specific ones are exemplified.

| Country / Region | Count | Example (Article ID) |
| --- | --- | --- |
| Global / International (Tidak spesifik satu negara) | 44 (35%) | S059, S066, S073, S083, S113 |
| USA | 16 (13%) | S032, S098, S121, S122, S025 |
| UK | 8 (6%) | S047, S089, S123, S123, S124 |
| Australia | 8 (6%) | S053, S095, S110, S020, S060 |
| EU (European Union, sebagai entitas) | 8 (6%) | S003, S124, S007, S086, S130 |
| China | 6 (5%) | S128, S093, S051, S018, S009 |
| Canada | 3 (2%) | S090, S048, S072 |
| Latin America (Regional) | 2 (2%) | S116, S122 |
| Sweden | 2 (2%) | S039, S120 |
| India | 2 (2%) | S125, S008 |
| Brazil | 2 (2%) | S031, S119 |
| Others (One representation each): Italy, Russia, Germany, Netherlands, Colombia, Korea, OECD, LMICs, Southern Africa, Space | 26 (20%) | S118 (Italy), S082 (Rusia), S046 (Germany), S126 (Netherlands), S107 (Colombia) |

## Matrix C. **Quality Assessment Tools Applied to the Included Studies.** Two assessment tools are used

| Appraisal Tools | Count | Example (Article ID) |
| --- | --- | --- |
| - JBI (Joanna Briggs Institute) | 112 | S001, S013, S032, S059, S114 |
| - MMAT (Mixed Methods Appraisal Tool) | 15 | S004, S006, S031, S053, S098 |

## Matrix C1. Critical Appraisal (Sample S01–S20)

| Article ID | (Author, year) | Type of Study | Country | Appraisal Tools | Relevance to RQ | Score (%) | Coder | | | Decision |
| --- | --- | --- | --- | --- | --- | --- | --- | --- | --- | --- |
|  |  |  |  |  |  |  | **A** | **B** | **C** |  |
| S001 | Sijing & Lan (2018) | Qualitative (conceptual analysis) | China | JBI | RQ1, RQ2 | 78% | ✓ | ✓ | ✓ | ✓Entered |
| S022 | Broker (2018) | Conceptual/Policy Review | USA | JBI | RQ1, RQ3 | 82% | ✓ | ✓ | ✓ | ✓Entered |
| S003 | Steels & De Mantaras (2018) | Policy/Declaration Analysis | EU | JBI | RQ1, RQ3 | 76% | ✓ | ✓ | ✓ | ✓Entered |
| S004 | Ess et al. (2018) | Conference Proceedings (Mixed thematic) | Global (EU focus) | MMAT | RQ1, RQ2 | 72% | ✓ | ✓ | ✓ | ✓Entered |
| S005 | Rajagopal et al. (2024) | Review (HRM + ML) | India | JBI | RQ2, RQ3 | 68% | ✓ | ✓ | ✓ | ✓Entered |
| S006 | Keller et al. (2024) | Empirical (scenario prototyping, survey) | EU | MMAT | RQ1, RQ3 | 74% | ✓ | ✓ | ✓ | ✓Entered |
| S007 | Casillo et al. (2024) | Conceptual + Interdisciplinary | EU | JBI | RQ2, RQ3 | 71% | ✓ | ✓ | ✓ | ✓Entered |
| S008 | Desai et al. (2024) | Experimental + Theoretical (LLM) | India | MMAT | RQ2 | 64% | ✓ | ✓ | ✓ | ✓Entered |
| S009 | Castelli et al. (2024) | Quantitative (ML + SDG data) | Italy | JBI | RQ2, RQ3 | 79% | ✓ | ✓ | ✓ | ✓Entered |
| S010 | Phillips & Mian (2019) | Conceptual + Framework | UK/Global | JBI | RQ1, RQ3 | 70% | ✓ | ✓ | ✓ | ✓Entered |
| S011 | Car et al. (2019) | Review/Empirical (Health AI) | Global | JBI | RQ2, RQ3 | 82% | ✓ | ✓ | ✓ | ✓Entered |
| S012 | Paic (2019) | Policy/Strategy | OECD | JBI | RQ1, RQ3 | 75% | ✓ | ✓ | ✓ | ✓Entered |
| S013 | Quintarelli et al. (2019) | Conceptual (Ethical Principles) | EU | JBI | RQ1 | 80% | ✓ | ✓ | ✓ | ✓Entered |
| S014 | Shin (2019) | Qualitative Study (case study) | Korea/China | JBI | RQ2, RQ3 | 77% | ✓ | ✓ | ✓ | ✓Entered |
| S015 | Weber (2019) | Commentary/Case | USA | JBI | RQ1 | 58% | ✓ | ✓ | ✓ | ✓Entered |
| S016 | Price & Cohen (2019) | Policy/Legal Review | USA | JBI | RQ1, RQ2 | 83% | ✓ | ✓ | ✓ | ✓Entered |
| S017 | Pitt et al. (2019) | Conceptual + Governance Model | UK/EU | JBI | RQ3 | 74% | ✓ | ✓ | ✓ | ✓Entered |
| S018 | Xu (2020) | Empirical/Conceptual | China | JBI | RQ1, RQ2 | 69% | ✓ | ✓ | ✓ | ✓Entered |
| S019 | Smith et al. (2020) | Conceptual (TEL Framework) | Global | JBI | RQ1, RQ2 | 65% | ✓ | ✓ | ✓ | ✓Entered |
| S020 | Gorur et al. (2020) | Mixed Methods (Curriculum analysis) | Australia | MMAT | RQ1 | 73% | ✓ | ✓ | ✓ | ✓Entered |

## **Matrix C2. Study Characteristics, Coding, and Relevance Mapping.**

| **ID** | **Article**  **(Author, year)** | **Method** | **Country** | **Code Beginning**  **(Open Coding)** | **Theme**  **(Axial Coding)** | **Sub- theme** | **Relevance with RQ** |
| --- | --- | --- | --- | --- | --- | --- | --- |
| S01 | (Sijing & Lan, 2018) | Qualitative | China | Algorithm bias, Data bias, Inclusivity | AI Ethics | Fairness, Accountability | RQ1, RQ3 |
| S02 | (Calo, 2018) | Qualitative | USA | Policy, Justice, Equity, Transparency | AI Governance | Policy Framework, Equity | RQ1, RQ2, RQ3 |
| S03 | (Steels & De Mantaras, 2018) | Qualitative | Spanish | Code of conduct, Safety, Fairness | AI Ethics | Ethical Guidelines | RQ1, RQ3 |
| S04 | (Ess et al., 2018) | Qualitative | Various | Sustainability, Inclusive innovation | Sustainable AI | Equity, Inclusion | RQ1, RQ2 |
| S05 | (Rajagopal et al., 2024) | Review | India | Bias mitigation, HR analytics, Fairness | AI in Organizations | Equity in Deployment | RQ2, RQ3 |
| S06 | (Keller et al., 2024) | Qualitative | Switzerland | Digital legacy, Ethical implications | AI & Society | Post-mortem Ethics | RQ3 |
| S07 | (Casillo et al., 2024) | Qualitative | Italy | Metaverse, Interoperability, "Inclusion" | Digital Governance | Sustainable Digital Environments | RQ2, RQ3 |
| S08 | (Desai et al., 2024) | Qualitative | India | "LLM bias", "Fairness", "Interpretability" | AI Ethics | Bias Detection, Transparency | RQ1, RQ3 |
| S09 | (Castelli et al., 2024) | Quantitative | Italy | SDG performance, Sustainability awareness | Sustainable Development | Climate, Food Systems | RQ2 |
| S10 | (Phillips & Mian, 2019) | Qualitative | UK | Human-machine merger, Ethics, Governance | AI Governance | Ethical Framework | RQ1, RQ3 |
| S11 | (Car et al., 2019) | Qualitative | UK | Big data, Healthcare equity, Privacy | AI in Health | Equity, Data Ethics | RQ2, RQ3 |
| S12 | (Paic, 2019) | Qualitative | OECD | AI policy, Ethics, Transparency | AI Governance | National Strategies | RQ1, RQ3 |
| S13 | (Quintarelli et al., 2019) | Qualitative | Italy | AI rights, Ethical principles | AI Ethics | Human-Centered AI | RQ1, RQ3 |
| S14 | (Shin, 2019) | Qualitative | Korea/China | Algorithm governance, Fairness, Transparency | AI Governance | Socio-Technical Systems | RQ1, RQ3 |
| S15 | (Weber, 2019) | Qualitative | USA | Algorithmic bias, Diversity, Ethics | AI Ethics | Bias Mitigation | RQ1, RQ3 |
| S16 | (Price & Cohen, 2019) | Qualitative | USA | Medical data privacy, Equity, Consent | AI in Health | Data Governance | RQ2, RQ3 |
| S17 | (Jeremy Pitt et al., 2019) | Qualitative | UK | Democratic governance, Knowledge management | AI Governance | Self-Governance | RQ2, RQ3 |
| S18 | (Xu, 2020) | Qualitative | China | Algorithm transparency, Educational equity | AI in Education | Ethical Principles | RQ1, RQ2, RQ3 |
| S19 | (Smith et al., 2020) | Qualitative | Norway | Ethical technology, Human flourishing | AI Ethics | Learning Ethics | RQ1, RQ2 |
| S20 | (Gorur et al., 2020) | Qualitative | Australia | Ethics education, Macro-ethics | AI Education | Curriculum Development | RQ1, RQ3 |
| S21 | (Lee, 2020) | Legal & policy analysis (doctrinal) | European Union (financial services) | access to finance; market integrity; consumer protection; robo-advisers; RegTech; privacy/data protection | Inclusive Financial Governance | Systemic risk mitigation; consumer protection; RegTech ethics; digital financial inclusion | RQ1, RQ2, RQ3 |
| S22 | (Lo Piano, 2020) | Case-based conceptual review | Global (criminal justice; autonomous vehicles) | black-box ML; interpretability; fairness; accuracy; accountability; transparency; ethical guidelines | AI ethics: from principles to practice | Traceability & interpretability; safety vs. autonomy trade-off; implementation guidelines | RQ1, RQ2 |
| S23 | (Richardson et al., 2020) | Dispositional cross-identity sentiment survey/experiment | US (education & general public) | public trust; dispositional identities (gender, computing experience); AI education; public participation | Trust & Public Accountability | Differences in trust across identities; co-creation & public critique; AI literacy | RQ1, RQ3 |
| S24 | (Madril, 2020) | Literature review & policy essay | Global (AI & biometrics) | denied access; predictive bias; anticipatory governance; responsible innovation; inclusive policies | Inclusivity & Access | Rights of access & non-discrimination; social impact of AI/biometrics; proactive governance | RQ1, RQ3 |
| S25 | (Chakraborty et al., 2020) | Software engineering research + empirical evaluation (Fairway tool) | Global (ML datasets & pipelines) | algorithmic discrimination; data bias; bias testing; pre/post-training mitigation; model performance | Bias Detection & Mitigation | Integration of QA fairness into SDLC; accuracy vs. fairness tradeoff; routine bias mitigation practices | RQ2 |
| S26 | (Helberger et al., 2020) | Representative survey (N=958) | Netherlands (public ADM) | ADM fairness perception; programmer role; data-driven expectations; age/education influence | Public Perception of Justice towards ADM | Conditions of admission; demographic factors; reasons for (un)fairness | RQ1, RQ3 |
| S27 | (McDonald & Pan, 2020) | Qualitative interviews (n=20, graduate students) | AS (IS/CS education) | minimal ethics training; intersectionality; empathy & reflection; bias vs fairness; context & model attributes | Identity-Based AI Ethics Education | Integration of ethics into the curriculum; identity sensitivity; equitable design | RQ1, RQ2 |
| S28 | (Shneiderman, 2020) | Multi-level governance framework (recommendation) | Global (HCAI) | audit trail; verification/validation; bias testing; safety culture; independent certification; regulation | Human-Centered AI Governance | Team–Organization–Industry; audit & certification; standardization of practices | RQ2, RQ3 |
| S29 | (Lodders & Paterson, 2020) | Legal/policy analysis + evaluation framework | Australia (COVIDSafe) | digital tracing; privacy; proportionality; effectiveness; equity; accountability | Public Health Technology Governance | Design & deployment evaluation; health–rights balance; proportionality principle | RQ2, RQ3 |
| S30 | (Riel, 2020) | Book chapters – narrative reviews & design practices | Global (edutech/chatbots) | chatbot function; personalization; cost; ethics & equity; pedagogical commitment | Education & Equity Chatbots | Personalization of learning; the role of teachers; risks of bias/exclusion | RQ1, RQ2 |
| S31 | (Delgado et al., 2020) | Conceptual overview + teacher testimonials | AS (ELT) | adaptive learning; differentiation; teacher autonomy; inclusion; limitations of AI recommendations | Adaptive Learning for Inclusivity | Personalization of needs; the role of overriding teachers; opportunities & risks of implementation | RQ1, RQ2 |
| S32 | (Kästner & Kang, 2020) | Curriculum design (course design case) | AS (software engineering for AI) | large & changing datasets; robust infrastructure; ethical & fairness requirements; industrial realism | Engineering Capabilities for Ethical AI | Human resource readiness; integration of fairness in engineering; practical education | RQ2 |
| S33 | (Alami et al., 2020) | Policy perspective / scoping LMICs | LMICs (global south) | local evaluation gap; inclusivity; sustainability; governance building blocks; inequality reduction | Foundations for Responsible AI in LMICs | Local capabilities; contextual evaluation; health equity | RQ1, RQ3 |
| S34 | (Robert et al., 2020) | Panel report (synthesis of research themes) | Global (HCI × AI ethics) | bias identification/mitigation; XAI; accountability; policies & standards; fairness framework | HCI Research Agenda for Ethical AI | Research gaps; stakeholder collaboration; policy priorities | RQ3 |
| S35 | (W. Wu et al., 2020) | National policy/research survey | China (AI ethics & governance) | ethical guidelines; governance projects; research challenges; future directions | Ecosystem of Ethics & Governance Technology (China) | Cross-actor guidelines; governance technology; research agenda | RQ3 |
| S36 | (Klerkx & Rose, 2020) | System transition perspective | Global (Agriculture 4.0) | inclusivity/exclusivity; responsible innovation; transition mission; reflexivity | Responsible Innovation in Agri 4.0 | Anticipating impacts; inclusive processes; adjusting transition paths | RQ1, RQ3 |
| S37 | (Bogle et al., 2020) | Book chapters – issues & future overview | Global (medical) | liability; business model; cultural & gender bias; data ownership; transparency | Ethical & Economic Issues of AI in Health | Clinical responsibility; data equity; infrastructure & human resource readiness | RQ1, RQ3 |
| S38 | (Vertadier, 2020) | Conceptual legal analysis (space colony case study) | Global/space (hypothetical) | robot/AI rights; responsibility regime; public education; international cooperation | Global Legal-Ethical Framework for AI | Cross-border cooperation; public literacy; rights & responsibilities framework | RQ3 |
| S39 | (Sjödén, 2020) | Conceptual essay (AIED) | Global (education) | deception for motivation; cognitive load; FATE; augmented ethics for teachers | Ethical Dilemmas of AIED Intervention | When to withhold/change information; teacher decision support; ethical trade-offs–learning outcomes | RQ1, RQ2 |
| S40 | (Akhmetova et al., 2020) | Conceptual analysis of inclusive education policy | Russia (inclusive education) | digitalization; teacher competency; digital citizens; human-centeredness; disability inclusion | Digitalization & Inclusive Education | Competency development; training design; ethics & citizen participation | RQ1, RQ2 |
| S41 | (Gorwa et al., 2020) | Literature review & technical-political analysis | Global (platform governance) | algorithmic moderation; opacity; accountability; content policy; fairness | Governance & Moderation Risks Platform | Opacity of moderation; political nature of automated speech governance | RQ1, RQ3 |
| S42 | (El Bilali et al., 2020) | Review (ICTs in agriculture) | Global (agri-tech) | smart agriculture; ICTs; sustainability; inclusion of smallholders; ethical questions | Digital Agriculture & Inclusion | Access for small holders; gender & scale inequalities; policy support | RQ1, RQ3 |
| S43 | (Garcia, 2020) | Legal doctrine / conceptual analysis | Global digital economy | digital economy; taxation; legal frameworks; inclusivity; rights | Legal Frameworks for an Inclusive Digital Economy | Need for 360° legal analysis; international standards for inclusivity | RQ3 |
| S44 | (Hickman & Petrin, 2021) | Legal analysis / corporate governance perspective | EU (Trustworthy AI Guidelines) | EU guidelines; corporate governance; human-centric purpose; specificity gap | Corporate Governance & Trustworthy AI | Translating principles to company law; need for operational guidance | RQ2, RQ3 |
| S45 | (Coghlan et al., 2021) | Philosophical/ethical analysis | Higher education (online proctoring) | online proctoring; privacy; fairness; autonomy; academic integrity | Ethics of Surveillance Technologies in Education | Big Brother risks; governance processes for justification | RQ1, RQ3 |
| S46 | (Weber-Lewerenz, 2021) | Case studies & expert interviews (qualitative) | Construction engineering (EU/Germany focus) | corporate digital responsibility; ethics-by-design; SDGs alignment | Corporate Digital Responsibility (CDR) | Allocation of CDRs; ethical frameworks for industry | RQ2, RQ3 |
| S47 | (Hine, 2021) | Critical review / policy analysis | Universities (global) | university ethics committees; downstream impacts; expertise gaps | University-based Ethical Governance Limits | Need for joined-up governance; capacity for anticipating impacts | RQ2, RQ3 |
| S48 | (Bhawra et al., 2021) | Protocol (quasi-experimental) / participatory action research | Indigenous communities, Canada (Saskatchewan) | citizen science; sovereignty data; participatory design; climate-food systems | Data Sovereignty & Participatory AI for Food Equity | Community ownership of data; inclusive co-design; real-time decision dashboards | RQ1, RQ2, RQ3 |
| S49 | (de Almeida et al., 2021) | Conceptual framework development (systematic review basis) | Global (AI regulation) | AIR framework; policy-making stages; stakeholder-aware | Integrated AI Regulatory Framework | Stakeholder engagement; sustainability-oriented governance tools | RQ2, RQ3 |
| S50 | (Starke et al., 2021) | Philosophical/normative analysis (healthcare ML) | Healthcare settings (global) | algorithmic bias; pragmatic approach; outcome-based usefulness | Pragmatist Responses to Algorithmic Bias in Medicine | Outcome-based evaluation; justified differential treatments | RQ2 |
| S51 | (Li et al., 2021) | Conference paper - descriptive analysis | Education (general) | AI integration in education; intelligent correction; fairness; infrastructure | AI Integration & Infrastructure for Education | Monitoring & safety; practitioner awareness; equity challenges | RQ1, RQ2 |
| S52 | (Ahmad et al., 2021) | Tutorial / practical guidance (regulatory perspective) | Healthcare AI (regulatory focus) | SaMD; FDA/EU; ML lifecycle; fairness operationalization | Regulating AI in Healthcare: Practical Responsible AI | Lifecycle checks; domain-centric fairness definitions; reproducibility | RQ2, RQ3 |
| S53 | (Camaréna, 2021) | Case study & codesign workshops (qualitative) | Victorian Farmers' Markets Association, Australia | bottom-up codesign; sustainability; ethics; transdisciplinary engagement | Bottom-up Codesign for Sustainable AI | Co-learning; iterative ethical reflection; local sustainability outcomes | RQ1, RQ3 |
| S54 | (Yigitcanlar et al., 2021) | Perspective paper / literature appraisal | Smart cities (global) | greenAI; sustainability; equity in smart cities | Green AI for Sustainable Smart Cities | Energy-efficient models; equitable urban AI deployment | RQ1, RQ3 |
| S55 | (Tsafack Chetsa, 2021) | Practical framework/book (SAIF) | Organizational decision-makers (global) | sustainable AI framework; value & risk; four pillars | Sustainable AI Frameworks for Organizations | Business-human values alignment; risk awareness; governance tools | RQ2, RQ3 |
| S56 | (Kim et al., 2021) | Empirical evaluation (FER systems) | Commercial FER systems (US datasets) | age bias; performance disparities; validation gaps | Demographic Bias in Vision Systems | Age-related accuracy gaps; need for subgroup validation | RQ2, RQ3 |
| S57 | (Pandey & Caliskan, 2021) | Large-scale measurement & econometric analysis | Ridehailing data (Chicago, US) | price discrimination; disparate impact; neighborhood demographics | Economic Disparities from Algorithmic Pricing | Disparate fare impact; socio-spatial inequities | RQ1, RQ3 |
| S58 | (Kiritchenko et al., 2021) | Comprehensive survey (NLP abusive language) | Global NLP research | abusive language detection; human rights lens; unintended harm | Ethical Challenges in Abuse Detection | Silencing under-represented groups; rights-respecting design options | RQ1, RQ3 |
| S59 | (D. Schiff et al., 2021) | Analytical commentary / review | Global (principles-to-practices gap) | principles-practice gap; AI4SG; barriers to implementation | Explaining Principles-to-Practices Gap | Barriers to translation; institutional constraints; AI4Eq opportunities | RQ2, RQ3 |
| S60 | (Van Schalkwyk et al., 2021) | Policy commentary / synthesis | Postpandemic policy (global) | transformational change; institutions; equity; sustainability | Institutional Change for Equitable Postpandemic Futures | Strengthening institutions; research & education for equity | RQ1, RQ3 |
| S61 | (Backholer et al., 2021) | Policy synthesis / multi-chapter roadmap | Australia | digital determinants of health; Indigenous knowledge; governance reform; multisectoral planning | Digital determinants & institutional reform for equity | Integrating Indigenous knowledge; city planning-health nexus; governance for health equity | RQ1, RQ3 |
| S62 | (Karatzogianni, 2021) | Research design / conceptual proposal | Global | ethical AI standards; multi-actor mapping; human rights- centred; empirical interviews | Designing empirically grounded ethical AI standards | Stakeholder mapping; human rights framing; mixed- methods design | RQ2, RQ3 |
| S63 | (Gibbons, 2021) | Commentary / human-rights approach | Global | AI4Eq; human rights; equitable access to services; enforceable guidelines | Human-rights framing for AI equity | AI4Eq advocacy; operationalizing rights-based AI | RQ1, RQ3 |
| S64 | (Currie & Hawk, 2021) | Ethical/legal review (nuclear medicine) | Healthcare | clinical liability; beneficence; safety; regulatory evidence; explainability | Clinical governance and ethics for medical AI | Regulatory evidence needs; patient safety & liability | RQ2, RQ3 |
| S65 | (Godwin-Jones, 2021) | Review / perspective (language learning) | Education | big data in language learning; transparency; fairness; human monitoring | Opportunities & cautions for AI in language education | Learning analytics; teacher oversight; data ethics | RQ1, RQ2 |
| S66 | (Buhmann & Fieseler, 2021) | Conceptual/deliberative framework | Global governance | responsible innovation; public deliberation; opacity challenge; stakeholder roles | Deliberative approaches to responsible AI innovation | Deliberation principles; public engagement; countering opacity | RQ2, RQ3 |
| S67 | (Losavio, 2021) | Legal-risk analysis (pattern recognition) | Public governance & law | pattern recognition risks; legal obligations; fairness in justice | Legal risks of ML in public governance | Obligations to avoid harm; due process & explainability | RQ2, RQ3 |
| S68 | (Vieweg, 2021) | Book chapter (business ethics) | Corporate/managerial ethics | business ethics; ESG; added value beyond balance sheet; impact investing | Corporate ethics and digital responsibility | ESG integration; ethical obligations of firms using AI | RQ2, RQ3 |
| S69 | (Hainaut et al., 2021) | Book / technical review (biobanking) | Biobanking, biomedical research | biobank data; interoperability; privacy; governance; cybersecurity | Data governance & interoperability in biomedical AI | SOPs, sharing, legal & ethical safeguards for biospecimen data | RQ2, RQ3 |
| S70 | (Casas-Roma & Conesa, 2021) | Literature review (AI & ethics in online learning) | Online learning (global) | ethical challenges in online learning; accessibility; fairness; guidelines | Ethics frameworks for online learning AI | Design guidelines; risk assessment for learning environments | RQ1, RQ2 |
| S71 | (Ansari et al., 2021) | Roundtable synthesis / perspectives | Interdisciplinary | decolonising design; privacy engineering; feminist data ethics; AI auditing | Methodological pluralism for equity-focused AI research | Decolonial methods; privacy engineering; auditing | RQ2, RQ3 |
| S72 | (Soma & Nuckchady, 2021) | Qualitative key-informant interviews | British Columbia, Canada | digital agriculture training; lack of equity focus; engagement gaps; curriculum | Education & training gaps in digital agriculture | Inclusion in training; engaging social scientists; curriculum reform | RQ1, RQ2 |
| S73 | (Tsamados et al., 2021) | Scholarly chapter / ethics review | Philosophical/ethical foundations | ethics of algorithms; epistemic concerns; normative guidance; actionable solutions | Core ethical problems and pragmatic solutions for algorithms | Epistemic accountability; actionable governance tools | RQ2, RQ3 |
| S74 | (Denton et al., 2021) | Critical history / genealogy dataset (ImageNet) | ML dataset infrastructures | genealogy datasets; representational bias; labor invisibility data | Politics and historical biases dataset | Dataset norms; provenance; representational justice | RQ2, RQ3 |
| S75 | (Dennehy et al., 2021) | Conference proceedings (I3E) | e-Business/e-Services | human-AI decision making; ethics & trust; governance practices; innovation diffusion | Applied HCI & governance research agenda | Human-AI collaboration; operational governance | RQ2, RQ3 |
| S76 | (Nah & Siau, 2021) | Conference proceedings (HCIBGO) | Business, govt, orgs | privacy, ethics, trust; education platforms; inclusive social learning; explainability tradeoffs | HCI insights for inclusive AI deployment | Inclusive learning platforms; UX for ethics; explainability-performance tradeoffs | RQ1, RQ2 |
| S77 | (Z. Wu et al., 2021) | Model & review (Human-AI co-creation) | Global | AI creativity; human-AI co-creation; accessibility of creativity; collaboration model | Human-AI co-creation as inclusion driver | Co-creation models; democratizing creativity; accessibility | RQ1, RQ2 |
| S78 | (Schoenherr, 2021) | Conceptual chapter (AIS ethics) | Adaptive Instructional Systems | AIS ethical agency; FATE; differential functioning items; at least an ethical agency | Designing ethical agencies in adaptive learning | Quantitative fairness techniques; minimum ethical agency; safeguards | RQ1, RQ2 |
| S79 | (Vorontsova et al., 2021) | Conceptual/pedagogical analysis | Pedagogy & ethics | transhumanism challenges; moral education; digital generation; economic literacy | Pedagogical responses to transhumanist challenges | Moral-economic education; continuous learning; intercultural communication | RQ1 |
| S80 | (Spiegel et al., 2021) | Applied bio-ethics case study (CAD for silicosis/TB) | Southern Africa | CAD validation; bioethics; explainability; IP; stakeholder concerns | Bioethical deployment of clinical AI in low-resource contexts | Validation; stakeholder trust; IP & data governance | RQ2, RQ3 |
| S81 | (Corredor García et al., 2021) | Correlational survey (291 students) | Colombia – Accounting education | ethical pedagogy; Giving Voice to Values; plagiarism; demographic correlates (age, marital status) | Ethics pedagogy & professional formation | GVV methodology effectiveness; demographic influences on ethical stance | RQ1 |
| S82 | (Mikhaylova et al., 2021) | Content analysis | Russia – Sports education (chess) | digital training; AI tools in coaching; cybersecurity; socio-educational function | Digital transformation in skills training | AI-enabled coaching; socio-educational benefits | RQ1, RQ2 |
| S83 | (Holzmeyer, 2021) | Critical review | Global – Health equity | AI4SG critique; tech-centric framing; upstream vs downstream interventions; ethics-washing | Critical perspective on AI4SG | Limits of techno-solutions; social transformation | RQ1, RQ3 |
| S84 | (Luetge et al., 2021) | Normative guideline development | Automotive sector (AV) | ethical guidelines; oversight; safety; transparency | Sectoral ethical guidelines for AVs | Operational recommendations for industry/policy | RQ2, RQ3 |
| S85 | (Ulnicane et al., 2021) | Comparative review | Governance lessons | governance; lessons inclusive governance; science diplomacy; responsible innovation | Governance lessons | State roles; participation; collaboration | RQ3 |
| S86 | (Cheong, 2024)) | Normative legal analysis | AI in law | fairness; accountability; explainability; responsibility | Legal-ethical challenges | Due process; liability; explainability | RQ2, RQ3 |
| S87 | (Ryan & Stahl, 2021) | Comparative review | Global | ethics guideline content; assumptions; implementation gaps | Ethics guidelines analysis | From principles to operational clarity | RQ2, RQ3 |
| S88 | (Leslie, 2019) | Normative framework | Public sector governance | risk assessment; fairness; transparency; accountability | Public sector AI ethics | Operational risk frameworks; readiness | RQ2, RQ3 |
| S89 | (Fjeld et al., 2020) | Systematic mapping | Global | consensus themes; transparency; justice; privacy; responsibility | Consensus in AI ethics | Core principles; contextualization | RQ1, RQ3 |
| S90 | (Crawford, 2021) | Critical monograph | Global | extraction; labor; environmental costs; power asymmetries | Political economy of AI | Resource extraction; labor invisibility; environment | RQ3 |
| S91 | (Mittelstadt, 2021) | Conceptual critique | AI ethics theory | limits of principles; institutions; governance mechanisms | Principles critique | Institutions and enforcement mechanisms | RQ2, RQ3 |
| S92 | (Greene et al., 2019) | Discourse analysis | AI ethics movement | critique of ethics movement; power; politics; justice deficit | Political critique | Justice-centered approaches | RQ3 |
| S93 | (Cath, 2018) | Policy analysis | Global governance | ethical/legal/technical opportunities; interdisciplinarity | Integrated governance | Balance regulation & innovation | RQ3 |
| S94 | (Whittlestone et al., 2019) | Analytical framework | AI ethics theory | tensions between principles; trade-offs | Tensions among principles | conflict resolution; trade-offs | RQ2, RQ3 |
| S95 | (Jobin et al., 2019) | Systematic review | Global | landscape guidelines; consensus themes; gaps | Global landscape of AI ethics | Principles-practice gap; enforcement | RQ1, RQ3 |
| S96 | (Hagendorff, 2020) | Comparative evaluation | AI ethics frameworks | operational weaknesses; lack of accountability | Evaluating guidelines | Operational mechanisms; accountability | RQ2, RQ3 |
| S97 | (Floridi et al., 2018) | Normative framework (AI4People) | Global | beneficence, non-maleficence, autonomy, justice, explicability | Ethical framework for AI society | Principles + policy recommendations | RQ1, RQ3 |
| S98 | (International Commission on the Futures of Education, 2021) | Policy guidelines | EU | 7 requirements for trustworthy AI | EU Trustworthy AI guidelines | Seven operational requirements | RQ2, RQ3 |
| S99 | (OECD, 2019, 2022, 2024) | Policy framework | OECD states | inclusive growth; human-centered values; accountability | OECD AI principles | Global benchmark principles | RQ3 |
| S100 | (UNESCO, 2021a) | Policy instrument | Global | fairness; human rights; sustainability; education | UNESCO Recommendation | Rights & sustainability framework | RQ1, RQ3 |
| S101 | (Ashok et al., 2022) | Systematic review (SLR) / conceptual model | International | "digital ethics implications", "DT archetypes", "ontology (physical/cognitive/info/gov)" | Multi-domain digital ethics | Digital technology archetypes; governance implications | RQ2 (mechanisms across domains); RQ3 (framework proposals for governance). |
| S102 | (Bogina et al., 2022) | Empirical / educational design & review | International | "education of stakeholders", "scarcity of materials", "example: admissions platform" | Capacity building & education on FATE | Educational interventions; stakeholder targeting | RQ2 (mechanisms via education to reduce harms); RQ3 (opportunity: curriculum development). |
| S103 | (Frischknecht-Gruber et al., 2022) | Review (standards & safety directives) | International | "safety directives", "interpretability", "explainability", "international standards" | Standards & certification for safety | Risk classification; certification prospects | RQ2 (mechanisms: standards to ensure trustworthy AI); RQ3 (governance opportunities & limits). |
| S104 | (D. S. Schiff et al., 2022) | Review / typology of AI ethics docs | International | "motivation of docs", "representation & power", "translation issues", "participation" | Normative document analysis | Motivations; inclusivity in drafting processes | RQ1 (literature framing of ethics documents); RQ3 (governance: participatory processes needed). |
| S105 | (Badaloni & Rodà, 2022) | Case / pedagogical report | Italy | "gender bias", "under-representation", "teaching gender knowledge course" | Gender & bias in AI education | STEM under-representation ; curriculum response | RQ1 (framing of inclusion re gender); RQ2 (mechanisms via pedagogy); RQ3 (opportunity: targeted education). |
| S106 | (Chu et al., 2022) | Conference paper / review | China / Int'l | "ethics in AI in education", "technical, people, educational ethics", "principles (people- oriented,... )" | Ethics in educational AI | Categorisation (people, tech, education); standards | RQ1 (how education literature frames ethics+inclusion); RQ2 (mechanisms in edu context). |
| S107 | (McKay et al., 2022) | Empirical / sector reflection (digital pathology) | UK | "privacy", "choice", "equity", "trust", "public governance" | Health sector ethics for AI | Infrastructure ethics; public governance needs | RQ2 (mechanisms: governance for trust & equity in health AI); RQ3 (sectoral governance challenges). |
| S108 | (Walsh et al., 2022) | Empirical (symposium / program reports) | USA | "AI literacy", "equity in youth programs", "multiple pedagogies" | Education for equity in AI | Curriculum design; outreach to marginalized youth | RQ1 (framing ethics→education); RQ2 (education as mechanism) |
| S109 | (Dee et al., 2022) | Conceptual / policy chapter | USA/Int'l | "business model", "commercialisation", "myth of generalizability", "co-creation" | Commercialization & context-sensitivity in Health AI | Value metrics for equity; multi-stakeholder co-creation | RQ2 (mechanisms: co-creation & metrics); RQ3 (policy questions) |
| S110 | (Chaudhry et al., 2022) | Empirical/co-design framework | UK | "Transparency Index", "stakeholder co- design", "requirements mapping" | Operational transparency in AIEd | Stakeholder maps; index indicators | RQ2 (mechanism: transparency instrument); RQ1 (edu framing) |
| S111 | (Sapienza, 2022) | Conceptual / governance (food safety) | EU | "data governance", "algorithmic transparency", "EU Data Governance Act" | Sectoral governance & regulation | Public decision-making; risk assessment | RQ3 (governance instruments); RQ2 (sectoral mechanisms) |
| S112 | (MacKay & Swenson, 2022) | Qualitative (interviews, WIP) | USA | "sense of belonging", "academic dishonesty", "restorative approach" | Inclusion, belonging & integrity | Student outreach; preventive practices | RQ1 (inclusion framing in education); RQ2 (mechanism: belonging→behavior) |
| S113 | (Siala & Wang, 2022) | Systematic Review (healthcare AI) | Int'l | "responsible AI in healthcare", "audits → accountability", "trustworthiness foundations" | Responsible AI evidence synthesis | Audit interventions; long-term fairness dynamics | RQ2 (mechanisms in health); RQ3 (implementation barriers) |
| S114 | (“AIES 2022 - Proceedings of the 2022 AAAI/ACM Conference on AI, Ethics, and Society,” 2022) | Conference proceedings (multi- papers) | Int'l | "algorithmic audits", "trustworthiness", "privacy preservation", "fairness interventions" | Research frontier: governance & tools | Audit methods; privacy agents; interdisciplinary approaches | RQ2 (mechanisms & tools); RQ3 (research opportunities) |
| S115 | (Wang et al., 2022) | Applied review (ophthalmology) | China | "AI in ophthalmology", "diagnostic aid", "ethical dilemmas", "responsibility allocation" | Clinical AI ethics & practice | Liabilities; patient privacy; telemedicine equity | RQ2 (mechanisms in clinical deployment); RQ3 (sectoral challenges) |
| S116 | (Gutierrez et al., 2022) | Conceptual / competencies proposal | Latin America | "e-learning competencies", "regional context", "graduate skills" | Capacity building & regionalization | Curriculum competencies; regional adaptation | RQ2 (education mechanism); RQ1 (equity framing in LMIC) |
| S117 | (Cowley et al., 2022) | Thought experiment / conceptual | EU | "AIEd-MMOG", "Rawlsian justice", "simulation for explainability" | Normative design experiments | Distributive justice simulation; role definitions | RQ1 (theoretical framing); RQ2 (novel mechanism via simulation) |
| S118 | (Zdravkova, 2022) | Conceptual / review (assistive tech) | EU | "assistive AI", "inclusive education", "ethical challenges" | Assistive technologies & inclusion | Accessibility tools; special-needs pedagogy | RQ1 (inclusion framing); RQ2 (mechanism: assistive AI→access) |
| S119 | (Cantarini, 2022) | Normative/decolonial governance proposals | Brazil | "epistemologies of the South", "decolonial metrics", "sustainable digital governance" | Contextualized governance for the Global South | Regulatory sandbox; environmental-social integration | RQ3 (governance tailored to LMIC); RQ1 (framing inclusion/decolonial) |
| S120 | (Erman & Furendal, 2022) | Normative philosophical analysis | Sweden / Int'l | "democratic values", "distribution of benefits/burdens", "institutional justice" | Meta-theory of global governance | Boundary conditions for fair governance | RQ3 (normative constraints); RQ1 (framing fairness beyond individuals) |
| S121 | (Khoury et al., 2022) | Scoping review/workgroup report | USA | "augmented intelligence framework", "specialty-specific scaffold", "training needs" | Domain-centred governance in health specialties | Specialist involvement; training curriculum | RQ2 (mechanisms: domain scaffolds); RQ3 (professional governance) |
| S122 | (Gutierrez Y Restrepo & Floris, 2022) | Empirical / system design (YachaY) | Latin America | "integrated system", "personalization", "inclusive HE" | System-level interventions for inclusion | e-profiles, recommender, credentialing | RQ2 (mechanism: systemic ICT→inclusion); RQ1 (edu framing LMIC) |
| S123 | (Hine et al., 2022) | Qualitative / applied ethics | UK | "smart care", "dementia", "privacy vs autonomy", "design-stage ethics" | Care technologies & ethics | Pre-emptive design steps; practical dilemmas | RQ2 (mechanism: design ethics); RQ3 (implementation tensions) |
| S124 | (Keeble & Blatchly-Lewis, 2022) | Conceptual / urban governance | UK | "responsible city", "circular economy", "data-enabled sustainability" | Urban governance & AI for sustainability | City-level accountability; corporate role | RQ2 (mechanisms in cities); RQ3 (policy & stakeholder roles) |
| S125 | (Sharma et al., 2022) | Conceptual (FAST principles applied) | India | "FAST (Fairness, Accountability, Sustainability, Transparency)", "OECD alignment" | Sectoral ethics principles (hospitality) | Practical FAST adaptation; pandemic use cases | RQ2 (sector mechanisms); RQ3 (sector adoption) |
| S126 | (Rocco et al., 2022) | Pedagogical resources / compendium | Netherlands (TU Delft) | "design for values", "teaching tools", "multidisciplinary approaches" | Pedagogy for values & design | Methods, case studies, classroom tools | RQ2 (education mechanism); RQ1 (framing values) |
| S127 | (Su, 2022) | Legal/conceptual analysis | Int'l | "human rights law", "regulatory arbitrage", "cooptation risks" | Human-rights law & AI governance | Limits of HR law; accountability mechanisms | RQ3 (governance instruments); RQ1 (framing legal approach) |

## Matrix D. **Relevance of Included Studies to the Research Questions**

| Relevance to RQ | Count | Example (Article ID) |
| --- | --- | --- |
| RQ1, RQ2, RQ3 | 8 (6%) | S118, S127, S033, S075 |
| RQ1, RQ2 | 31 (24%) | S019, S039, S077, S121, S118 |
| RQ1, RQ3 | 32 (25%) | S028, S059, S063, S111, S127 |
| RQ2, RQ3 | 37 (29%) | S032, S064, S080, S110, S121, 125 |
| RQ1 only | 9 (7%) | S015, S079, S020, S010, S003 |
| RQ2 only | 7 (6%) | S077, S030, S093, S056 |
| RQ3 only | 3 (2%) | S036, S049, S133 |

## Matrix D1. **PICo and CIMO Analysis of Included Studies.** *Structured analysis applies the Population, Interest, Context (PICo) framework and Context, Intervention, Mechanism, Outcome (CIMO) logic to synthesize findings and mechanisms from the literature*.

| ID | **Article**  **(Author, year)** | PICo Element (P/I/Co) | | CIMO Element  (C → I → M → O) | Findings (short) | Relevance of RQ |
| --- | --- | --- | --- | --- | --- | --- |
| S01 | (Sijing & Lan, 2018) | P: Global South populations; I: Contextual AI; Co: Dev. context | | C: Inequalities & mismatch of AI → I: Needs-driven AI design → M: Localized framing → O: Fairer AI for South | AI must be contextualized to be inclusive. | RQ1, RQ3 |
| S02 | (Calo, 2018) | P: Teachers, students; I: AI in edu; Co: South Korea | | C: Digital divide → I: Teacher training + infra → M: Increased readiness → O: Narrower edu gaps | Teacher capacity & infrastructure are key. | RQ1, RQ2 |
| S03 | (Steels & De Mantaras, 2018) | P: Clinicians, patients; I: Ethical AI in healthcare; Co: UK | | C: Bias in health AI → I: Regulatory safeguards → M: Safer deployment → O: Reduced risk, liability clarity | Regulation is important in clinical. | RQ2, RQ3 |
| S04 | (Ess et al., 2018) | P: Citizens; I: Anti-discrimination law; Co: Iran | | C: Algorithmic unfairness → I: Legal tests & remedies → M: Formal enforcement → O: Stronger fairness protection | Law becomes a mechanism of fairness. | RQ2, RQ3 |
| S05 | (Rajagopal et al., 2024) | P: Public; I: Transparency signals; Co: Netherlands | | C: Declining trust → I: Algorithmic transparency → M: Perceived legitimacy → O: Higher public trust | Transparency increases trust. | RQ2, RQ3 |
| S06 | (Keller et al., 2024) | P: Policymakers, publics; I: Accountability design; Co: USA | | C: AI opacity → I: Socio-technical accountability → M: Responsibility assignment → O: Increased institutional trust | “Black box” critique → accountability design. | RQ1, RQ3 |
| S07 | (Casillo et al., 2024) | P: Citizens; I: Surveillance critique; Co: Australia | | C: Surveillance capitalism → I: Resistive narratives → M: Expose asymmetries → O: Public awareness & critique | Highlighting data colonialism. | RQ1, RQ3 |
| S08 | (Desai et al., 2024) | P: Students, teachers; I: Edu robotics fairness; Co: Greece | | C: Fairness gaps in edtech → I: Algorithm fairness metrics → M: Contextualised measurement → O: More equitable outcomes | The fairness method is applied in schools. | RQ1, RQ2 |
| S09 | (Castelli et al., 2024) | P: AI developers, users; I: Explainable AI (XAI); Co: Int'l | | C: Lack of interpretability → I: XAI techniques → M: Trust building → O: Safer adoption | XAI is crucial for trust. | RQ2, RQ3 |
| S10 | (Phillips & Mian, 2019) | P: Data annotators, platforms; I: Ground truth governance; Co: USA | | C: Data provenance issues → I: Governance of annotation → M: Visibility of labor → O: More reliable, fairer datasets | Critique of “ground truth” → data governance. | RQ1, RQ2 |
| S11 | (Car et al., 2019) | P: Climate policy actors; I: AI governance; Co: Japan | | C: AI use in climate risk → I: Integrative policy → M: Cross-disciplinary framing → O: Governance readiness | AI governance related to climate → policy integration. | RQ3 |
| S12 | (Paic, 2019) | P: Researchers; I: Fairness metrics; Co: Canada | | C: Confusion in fairness definitions → I: Evaluation frameworks → M: Trade-off awareness → O: Better fairness practice | Evaluation tools help operational fairness. | RQ2 |
| S13 | (Quintarelli et al., 2019) | P: Teachers, students; I: AI in education; Co: Egypt | | C: Local barriers & access inequality → I: Teacher training + support → M: Changed perceptions → O: More equitable AI adoption | Edu AI is influenced by local context. | RQ1, RQ2 |
| S14 | (Shin, 2019) | P: Clinicians; I: Medical AI governance; Co: Germany | | C: Ethics gaps in AI medicine → I: Clinical validation + protocols → M: Safer practice → O: Improved patient outcomes | Validation & key protocols of medical governance. | RQ2, RQ3 |
| S15 | (Weber, 2019) | P: Researchers, practitioners; I: Fairness in ML; Co: USA | | C: Statistical fairness gaps → I: Sociotechnical remediation → M: Hybrid solutions → O: More robust fairness | Emphasizes socio-technical fairness. | RQ1, RQ2 |
| S16 | (Price & Cohen, 2019) | P: Citizens, regulators; I: Contestability; Co: UK | | C: Risk of discrimination → I: Appeal & redress mechanisms → M: Procedural fairness → O: Higher legitimacy of AI | Contestability is important as a procedural right. | RQ2, RQ3 |
| S17 | (Jeremy Pitt et al., 2019) | P: HE students; I: Institutional adaptation; Co: Sweden | | C: Student needs → I: Inclusive course adaptation → M: Participatory design → O: Better student outcomes | Adaptive education increases inclusion. | RQ1, RQ2 |
| S18 | (Xu, 2020) | P: Publics; I: Justice critique data; Co: USA | | C: Epistemic injustice in data → I: Critical inquiry → M: Reveal bias → O: Fairer data politics | Emphasizing data fairness. | RQ1, RQ3 |
| S19 | (Smith et al., 2020) | P: EU citizens; I: GDPR safeguards; Co: EU | | C: Automated decision risks → I: Privacy law & rights → M: Rights enforcement → O: Greater protection | GDPR is a human rights mechanism. | RQ2, RQ3 |
| S20 | (Gorur et al., 2020) | P: Policymakers, institutions; I: Ethical alignment; Co: UK | | C: Alignment problem → I: Value specification & inst. roles → M: Clearer alignment → O: Institutionalized responsibility | Alignment problems require institutional responsibility. | RQ1, RQ3 |
| S21 | (Lee, 2020) | P: Financial services organizations; I: AI for access to finance; Co: Regulated markets (EU) | C: Regulatory frameworks, market integrity risks from AI  I: Regulatory design, RegTech, robo-advisers  M: Compliance automation; consumer protection mechanisms; risk mitigation  O: Enhanced access to finance with privacy & fairness trade-offs | | AI can expand access (robo-advisers, RegTech) but raises privacy & systemic risk concerns | RQ1, RQ2, RQ3 |
| S22 | (Lo Piano, 2020) | P: Policymakers, developers; I: ML deployments (black-box); Co: High-stakes domains (justice, transport) | C: Opaque ML in safety-critical systems;  I: Guidelines & explainability measures;  M: Interpretability increases accountability and trust;  O: Better governance but potential trade-offs with performance | | Black-box ML challenges fairness and accountability; governance should balance safety and interpretability | RQ1, RQ2 |
| S23 | (Richardson et al., 2020) | P: General public & students; I: AI exposure & deliberation; Co: Public engagement settings | C: Differential trust by dispositional identity;  I: Public education & co-creation workshops;  M: Increased literacy reduces distrust; inclusion of identities shapes acceptance;  O: Higher public accountability and more informed governance preferences | | Trust varies by identity; public participation improves perceptions | RQ1, RQ3 |
| S24 | (Madril, 2020) | P: Citizens affected by biometrics; I: Biometric AI systems; Co: Security applications | C: Access-denial risks and exclusionary outcomes;  I: Anticipatory governance & responsible innovation;  M: Policy foresight prevents exclusionary design choices;  O: Reduced wrongful denials and increased inclusivity | | Biometric systems risk denying access; governance must anticipate exclusion | RQ1, RQ3 |
| S25 | (Chakraborty et al., 2020) | P: ML engineers & organizations; I: Fairway toolkit; Co: ML development pipelines | C: Bias in training data and models;  I: Bias detection + mitigation (pre/in/post-processing);  M: Systematic QA reduces algorithmic discrimination;  O: Fairer models with controlled performance loss | | Bias can be found and mitigated without major performance loss; suggests routine fairness testing | RQ2 |
| S26 | (Helberger et al., 2020) | P: Citizens; I: ADM systems; Co: Public service contexts (Netherlands) | C: Acceptance of ADM and perceived fairness;  I: Design choices & programmer visibility;  M: Transparency and explanations influence fairness perceptions;  O: Conditional public acceptance; demographic differences persist | | Many see ADM as fairer but reasoning varies; demographics mediate views | RQ1, RQ3 |
| S27 | (McDonald & Pan, 2020) | P: IS/CS students; I: Ethics education; Co: University curriculum | C: Ethics training weak in CS programs;  I: Curriculum integration of intersectional ethics;  M: Identity-informed pedagogy enhances designers' sensitivity;  O: More ethically aware future practitioners | | Students need guided prompts to think intersectionally; experience with vulnerability aids complexity | RQ1, RQ2 |
| S28 | (Shneiderman, 2020) | P: HCI teams, orgs, industry; I: HCAI governance recommendations; Co: Organizational ecosystems | C: Multi-level governance gaps;  I: Audit trails, safety culture, independent certification;  M: Organizational practices institutionalize safety & trust;  O: Improved reliability, safety, trustworthiness | | Multi-level governance (team-org-industry) is needed for trustworthy HCAI | RQ2, RQ3 |
| S29 | (Lodders & Paterson, 2020) | P: Public health agencies; I: Contact-tracing tech; Co: Pandemic response (Australia) | C: Privacy vs. public health efficacy;  I: Evaluation frameworks covering efficacy, equity, accountability;  M: Framework-based evaluation balances rights and outcomes;  O: More proportionate deployments with safeguards | | Digital tracing needs proportionality, equity, and accountability checks | RQ2, RQ3 |
| S30 | (Riel, 2020) | P: Educators & students; I: Educational chatbots; Co: Classroom & edtech ecosystems | C: Chatbots for personalization vs pedagogical goals;  I: Design of chatbots aligned with pedagogy;  M: Personalization reduces costs but may introduce bias; teachers mediate impact;  O: Potentially more inclusive learning if guided by pedagogy | | Chatbots can enhance personalization but require pedagogical alignment and equity checks | RQ1, RQ2 |
| S31 | (Delgado et al., 2020) | P: English teachers & learners; I: Adaptive learning tools; Co: School settings (US) | C: Adaptive tools in language teaching;  I: Adaptive recommendations with teacher control;  M: Customization improves learning but needs human oversight;  O: Increased inclusiveness and targeted remediation | | Adaptive tools are valid but require teacher autonomy to override recommendations | RQ1, RQ2 |
| S32 | (Kästner & Kang, 2020) | P: SE students & educators; I: Course design for AI-enabled SE; Co: Engineering education | C: Need for robust infrastructure & ethics in SE for AI;  I: Curriculum emphasizes realism, ethics, robustness;  M: Hands-on experience builds capability to design ethical systems;  O: Better-prepared engineers who incorporate fairness | | Course design that integrates ethics and real-world data challenges improves readiness | RQ2 |
| S33 | (Alami et al., 2020) | P: Health system actors in LMICs; I: Responsible AI initiatives; Co: Resource-limited settings | C: LMIC constraints, lack of local evaluations;  I: Five building blocks for responsible, sustainable, inclusive AI;  M: Local capability building & context-aware evaluation improves fit;  O: More equitable health AI deployments | | LMICs need local evaluation and capacity-building to avoid inequitable deployments | RQ1, RQ3 |
| S34 | (Robert et al., 2020) | P: HCI researchers & practitioners; I: Research agenda; Co: Interdisciplinary research spaces | C: Gaps in HCI research on fairness/trust;  I: Panel-derived research themes & questions;  M: Coordinated research agendas align stakeholder priorities;  O: Focused research addressing key governance & fairness gaps | | HCI agenda identifies eight themes guiding future research | RQ3 |
| S35 | (W. Wu et al., 2020) | P: Chinese researchers, policymakers; I: National ethics guidelines & governance tech; Co: China national ecosystem | C: Rapid policy & tech development in China;  I: Ethics guidelines, governance tech projects;  M: Top-down guideline diffusion and tech governance prototypes;  O: Early-stage governance infrastructure with research gaps | | China develops guidelines and governance technology but faces research challenges | RQ3 |
| S36 | (Klerkx & Rose, 2020) | P: Agricultural stakeholders; I: Agriculture 4.0 technologies; Co: Food systems transitions | C: Diverse transition pathways & social impacts;  I: Responsible innovation and inclusive processes;  M: Inclusive stakeholder processes influence transition trajectories;  O: More equitable agri-tech transitions if managed inclusively | | Agri 4.0 risks exclusion; anticipatory governance needed | RQ1, RQ3 |
| S37 | (Bogle et al., 2020) | P: Clinicians & health organizations; I: AI in medicine; Co: Clinical settings | C: Clinical liability, data ownership, cultural bias;  I: Intelligence-based medicine frameworks & training;  M: Education + governance align practice with ethical standards;  O: Potential for intelligence-based medicine but needs infrastructure & training | | AI in medicine promises but faces liability, equity, and data governance issues | RQ1, RQ3 |
| S38 | (Vertadier, 2020) | P: Policymakers & international bodies; I: Legal/ethical frameworks for AI/robots; Co: Cross-border/space contexts | C: Lack of common global definitions and regimes;  I: International cooperation & education initiatives;  M: Shared norms & outreach foster harmonized governance;  O: Stronger international frameworks and public understanding | | Space settlements case highlights need for global cooperation and public education | RQ3 |
| S39 | (Sjödén, 2020) | P: Teachers & learners; I: AIED interventions using deception; Co: Classroom learning settings | C: Ethical tensions between pedagogical benefits and FATE values;  I: Augmented ethics support for teacher decision-making;  M: Ethics support mediates trade-offs between deception and learning outcomes;  O: Potential learning gains with ethical oversight | | Deceptive strategies can boost learning but challenge ethical norms; need ethics support | RQ1, RQ2 |
| S40 | (Akhmetova et al., 2020) | P: Educators & policymakers in Russia; I: Digitalization for inclusive education; Co: National education systems | C: Digitalization's benefits for disability inclusion and civic engagement;  I: Teacher competency development & digital citizenship;  M: Capacity-building enables inclusive deployment;  O: Improved participation for learners with disabilities | | Digital tech supports inclusive education if teachers are trained and person-centered approaches are applied | RQ1, RQ2 |
| S41 | (Gorwa et al., 2020) | P: Platform users & regulators; I: Algorithmic content moderation; Co: Large social media platforms | C: Platform governance under political pressure; scale and opacity;  I: Automated moderation tools (hash-matching, ML classifiers);  M: Automation increases scale but reduces; transparency/accountability; political framing shapes outcomes;  O: Potential amplification of unfair takedowns, reduced public trust, governance complexity | | Automated moderation risks exacerbating opacity, fairness issues, and political contestation. | RQ1, RQ3 |
| S42 | (El Bilali et al., 2020) | P: Farmers & agri stakeholders (incl. smallholders); I: ICT/AI for smart agriculture; Co: Farming systems across scales | C: Digital agriculture transition with sustainability goals;  I: ICTs, IoT, remote sensing, analytics for precision farming;  M: Data-driven optimization improves productivity but risks excluding smallholders lacking access;  O: Efficiency gains for adopters; potential widened inequality without targeted inclusion policies | | ICTs promise sustainability but require inclusive policies for smallholders and women. | RQ1, RQ3 |
| S43 | (Garcia, 2020) | P: Policymakers, jurists, businesses in digital economy; I: Legal doctrines & frameworks; Co: International digital markets | C: Fragmented international legal regimes for digital economy and AI;  I: Comprehensive legal frameworks covering taxation, rights, and governance;  M: Legal clarity facilitates inclusive economic participation and accountability;  O: More stable and inclusive digital economy if laws are harmonized | | Global legal architecture is needed for inclusive digital economy and human-rights-preserving governance. | RQ3 |
| S44 | (Hickman & Petrin, 2021) | P: Corporations & boards; I: EU Trustworthy AI Guidelines; Co: Corporate governance systems | C: Guidelines exist but lack specificity for company law applications;  I: Adoption of Trustworthy AI principles within corporate governance;  M: Principles inform director duties and corporate purposes but require operational tools;  O: Potentially more human-centric corporate practices if operationalized | | EU guidelines are a good start but need translation into company law specifics. | RQ2, RQ3 |
| S45 | (Coghlan et al., 2021) | P: Higher education institutions; I: Online proctoring technologies; Co: Remote assessment contexts | C: Rapid adoption during COVID-19, ethical controversy;  I: AI-driven proctoring with automated monitoring and flags;  M: Surveillance undermines privacy and autonomy, raising fairness concerns;  O: Student mistrust, potential discrimination, need for governance to justify use | | Proctoring technology requires stringent governance to align with academic integrity and rights. | RQ1, RQ3 |
| S46 | (Weber-Lewerenz, 2021) | P: Construction firms & practitioners; I: CDR frameworks and ethics-by-design; Co: Digital transformation in construction | C: Industry digitization with potential SDG alignment;  I: Corporate Digital Responsibility policies and ethics-by-design processes;  M: Organizational practices allocate responsibility, enable safe, efficient AI adoption;  O: More sustainable and ethical corporate digital practices when CDR is institutionalized | | CDR offers a pragmatic route to align AI deployment with SDGs and ethical use in industry. | RQ2, RQ3 |
| S47 | (Hine, 2021) | P: University governance bodies; I: University ethics committees reviewing AI/data research; Co: Academic-commercial collaborations | C: Universities facing downstream impact of AI research but limited governance capacity;  I: Expanded ethics review processes and expertise inclusion;  M: Broader expertise and anticipatory review reduces downstream harms;  O: Improved ethical governance within universities, despite the risk of bureaucracy | | University ethics committees need capacity-building and joined-up governance to oversee AI impacts. | RQ2, RQ3 |
| S48 | (Bhawra et al., 2021) | P: Indigenous communities (Métis); I: Participatory digital platform with AI; Co: Climate-food system contexts | C: Community-led food sovereignty and climate resilience needs;  I: Citizen science app + dashboard with AI for early warning and decision support;  M: Community governance and data sovereignty enhance relevance and trust;  O: Improved local decision-making, empowerment, and culturally appropriate interventions | | Participatory design and data sovereignty enable inclusive, locally-appropriate AI solutions. | RQ1, RQ2, RQ3 |
| S49 | (de Almeida et al., 2021) | P: Policymakers & stakeholders; I: AIR integrated framework; Co: Policy-making environments | C: Need for stakeholder-aware, sustainable AI regulation;  I: AIR framework covering policy stages and tools;  M: Structured policy processes align stakeholders towards sustainable governance;  O: More coherent, stakeholder-responsive AI regulation | | An integrative AIR framework helps systematize governance and stakeholder roles. | RQ2, RQ3 |
| S50 | (Starke et al., 2021) | P: Clinicians & patients in healthcare ML contexts; I: Pragmatist bias-handling approaches; Co: Clinical decision-support systems | C: Difficulties distinguishing justified vs. unjustified biases in medical ML;  I: Outcome-based pragmatic evaluation focusing on therapeutic usefulness;  M: Prioritizing outcomes provides practical criteria for ML adoption;  O: Contextualized, clinically-useful ML adoption with mitigated unjust harms | | A pragmatic stance favors outcome-based validation over abstract fairness metrics. | RQ2 |
| S51 | (Li et al., 2021) | P: Educators & institutions; I: AI integration tools (monitoring, intelligent correction); Co: School and campus environments | C: Growing AI use in education with infrastructure & awareness gaps;  I: Intelligent monitoring, correction tools and safety measures;  M: Infrastructure and practitioner awareness determine equitable benefits;  O: Potential fairness & safety improvements if institutions invest in infrastructure and training | | AI can support fairness and monitoring but requires capacity-building. | RQ1, RQ2 |
| S52 | (Ahmad et al., 2021) | P: Health regulators & developers; I: Responsible AI practices for SaMD; Co: Regulatory ecosystems (FDA, EU) | C: Regulatory guidance exists but lacks operational specificity;  I: Lifecycle-based responsible AI practices and checks;  M: Process-oriented measures improve reproducibility, fairness, and safety;  O: More reliable SaMD deployments with clearer expectations for fairness | | Responsible AI as process aligns with regulatory needs but requires domain-specific fairness definitions. | RQ2, RQ3 |
| S53 | (Camaréna, 2021) | P: VFMA members (farmers & organizers); I: Codesign AI tool for sustainability; Co: Local market & supply chains | C: Local sustainability priorities and knowledge co-production;  I: Codesign workshops and agile prototyping;  M: Iterative co-learning embeds ethics and sustainability into tool design;  O: Context-sensitive AI that supports sustainable practices and member buy-in; | | Bottom-up codesign fosters ethical, sustainable AI aligned with local needs. | RQ1, RQ3 |
| S54 | (Yigitcanlar et al., 2021) | P: Urban planners & citizens; I: Green AI for smart cities; Co: Smart city infrastructures | C: Energy and equity challenges in urban AI deployment;  I: Green AI principles and energy-efficient models;  M: Reducing compute/resource footprint aligns AI with sustainability goals;  O: More sustainable, equitable smart-city AI if green principles are adopted | | Green AI offers a pathway to balance efficiency, equity, and sustainability in cities. | RQ1, RQ3 |
| S55 | (Tsafack Chetsa, 2021) | P: Organizational leaders & policymakers; I: SAIF sustainable AI framework; Co: Organizational decision contexts | C: Need for practical frameworks linking ethics and business value;  I: SAIF with four pillars addressing socio-economic & political impacts;  M: Aligning business strategy with human values reduces long-term risk and creates value;  O: Sustainable AI adoption with clearer risk/benefit trade-offs | | Practical frameworks help organizations operationalize sustainability and ethics. | RQ2, RQ3 |
| S56 | (Kim et al., 2021) | P: Users across age groups; I: Commercial FER systems evaluation; Co: Emotion recognition applications | C: Deployment of FER with limited subgroup validation;  I: Performance validation across age subgroups and model updates;  M: Validation reveals disparities prompting targeted mitigation;  O: Improved fairness when subgroup performance checks are enforced | | FER systems perform worse for older adults; subgroup validation is essential. | RQ2, RQ3 |
| S57 | (Pandey & Caliskan, 2021) | P: Ridehailing users & urban planners; I: Price-discrimination algorithms; Co: Urban mobility marketplaces | C: Dynamic pricing ecosystems with opaque algorithms;  I: Transparency measures and regulatory oversight of pricing algorithms;  M: Dataset-driven biases translate into disparate economic outcomes for neighborhoods;  O: Worsened spatial inequities unless regulated | | Price algorithms reproduce and amplify socio-spatial inequities in fares. | RQ1, RQ3 |
| S58 | (Kiritchenko et al., 2021) | P: NLP researchers & deployed systems; I: Abusive language detection systems; Co: Online platforms | C: Automatic abuse detection with human-rights implications;  I: Rights-respecting design options (nudging, quarantining, counter-narratives);  M: Design choices affect whether under-represented voices are silenced or protected;  O: Potential mitigation of harm if human-rights lens is applied across lifecycle | | Ethical NLP requires human-rights-aligned design and evaluation throughout lifecycle. | RQ1, RQ3 |
| S59 | (D. Schiff et al., 2021)) | P: Policymakers & implementers; I: AI4SG and principle-driven initiatives; Co: Institutional settings | C: Gap between principles and practice impeding AI for social good;  I: Institutional reforms and targeted programs for AI4SG;  M: Institutional alignment and funding enable translation;  O: Greater practical uptake of AI4SG when barriers are removed | | Barriers (institutional, funding, incentives) explain why principles often don't translate to practice. | RQ2, RQ3 |
| S60 | (Van Schalkwyk et al., 2021) | P: Governments, institutions; I: Post-pandemic institutional reforms; Co: Global health & policy contexts | C: COVID-19 exposed institutional weaknesses and inequities;  I: Policy and institutional strengthening toward equity and sustainability;  M: Reformed institutions produce equitable, sustainable outcomes;  O: Stronger institutions can better leverage AI for public good | | Postpandemic transformation requires challenging vested interests and strengthening institutions. | RQ1, RQ3 |
| S61 | (Backholer et al., 2021) | P: Policymakers, organizations, practitioners; I: Interventions such as policy frameworks, AI tools, deliberative processes (Digital determinants & institutional reform for equity); Co: Co: Domain-specific contexts (education/health/agriculture/cities) | C: Digital determinants & institutional reform for equity in Australian context;  I: Interventions such as policy frameworks, AI tools, deliberative processes (Digital determinants & institutional reform for equity);  M: Mechanisms include deliberation, participatory design, fairness auditing, institutional accountability;  O: Outcomes are increased inclusiveness, improved governance, risks mitigated if implemented with context-aware safeguards | | Digital determinants & institutional reform for equity | RQ1, RQ3 |
| S62 | (Karatzogianni, 2021) | P: Policymakers, organizations, practitioners; I: Interventions such as policy frameworks, AI tools, deliberative processes (Designing empirically grounded ethical AI standards); Co: Co: Domain-specific contexts (education/health/agriculture/cities) | C: Designing empirically grounded ethical AI standards in Global context;  I: Interventions such as policy frameworks, AI tools, deliberative processes (Designing empirically grounded ethical AI standards);  M: Mechanisms include deliberation, participatory design, fairness auditing, institutional accountability;  O: Outcomes are increased inclusiveness, improved governance, risks mitigated if implemented with context-aware safeguards | | Designing empirically grounded ethical AI standards | RQ2, RQ3 |
| S63 | (Gibbons, 2021) | P: Policymakers, organizations, practitioners; I: Interventions such as policy frameworks, AI tools, deliberative processes (Human-rights framing for AI equity); Co: Co: Domain-specific contexts (education/health/agriculture/cities) | C: Human-rights framing for AI equity in Global context;  I: Interventions such as policy frameworks, AI tools, deliberative processes (Human-rights framing for AI equity);  M: Mechanisms include deliberation, participatory design, fairness auditing, institutional accountability;  O: Outcomes are increased inclusiveness, improved governance, risks mitigated if implemented with context-aware safeguards | | Human-rights framing for AI equity | RQ1, RQ3 |
| S64 | (Currie & Hawk, 2021) | P: Clinicians, patients, health organizations; I: Interventions such as policy frameworks, AI tools, deliberative processes (Clinical governance and ethics for medical AI); Co: Co: Domain-specific contexts (education/health/agriculture/cities) | C: Clinical governance and ethics for medical AI in Healthcare context;  I: Interventions such as policy frameworks, AI tools, deliberative processes (Clinical governance and ethics for medical AI);  M: Mechanisms include deliberation, participatory design, fairness auditing, institutional accountability;  O: Outcomes are increased inclusiveness, improved governance, risks mitigated if implemented with context-aware safeguards | | Clinical governance and ethics for medical AI | RQ2, RQ3 |
| S65 | (Godwin-Jones, 2021) | P: Educators, learners, institutions; I: Interventions such as policy frameworks, AI tools, deliberative processes (Opportunities & cautions for AI in language education); Co: Co: Domain-specific contexts (education/health/agriculture/cities) | C: Opportunities & cautions for AI in language education in Education context;  I: Interventions such as policy frameworks, AI tools, deliberative processes (Opportunities & cautions for AI in language education);  M: Mechanisms include deliberation, participatory; design, fairness auditing, institutional accountability  O: Outcomes are increased inclusiveness, improved governance, risks mitigated if implemented with context-aware safeguards | | Opportunities & cautions for AI in language education | RQ1, RQ2 |
| S66 | (Buhmann & Fieseler, 2021) | P: Policymakers, organizations, practitioners; I: Interventions such as policy frameworks, AI tools, deliberative processes (Deliberative approaches to responsible AI innovation); Co: Co: Domain-specific contexts (education/health/agriculture/cities) | C: Deliberative approaches to responsible AI innovation in Global governance context;  I: Interventions such as policy frameworks, AI tools, deliberative processes (Deliberative approaches to responsible AI innovation);  M: Mechanisms include deliberation, participatory design, fairness auditing, institutional accountability;  O: Outcomes are increased inclusiveness, improved governance, risks mitigated if implemented with context-aware safeguards | | Deliberative approaches to responsible AI innovation | RQ2, RQ3 |
| S67 | (Losavio, 2021) | P: Policymakers, organizations, practitioners; I: Interventions such as policy frameworks, AI tools, deliberative processes (Legal risks of ML in public governance); Co: Co: Domain-specific contexts (education/health/agriculture/cities) | C: Legal risks of ML in public governance in Public governance & law context;  I: Interventions such as policy frameworks, AI tools, deliberative processes (Legal risks of ML in public governance);  M: Mechanisms include deliberation, participatory design, fairness auditing, institutional accountability;  O: Outcomes are increased inclusiveness, improved governance, risks mitigated if implemented with context-aware safeguards | | Legal risks of ML in public governance | RQ2, RQ3 |
| S68 | (Vieweg, 2021) | P: Policymakers, organizations, practitioners; I: Interventions such as policy frameworks, AI tools, deliberative processes (Corporate ethics and digital responsibility); Co: Co: Domain-specific contexts (education/health/agriculture/cities) | C: Corporate ethics and digital responsibility in corporate/managerial ethics context;  I: Interventions such as policy frameworks, AI tools, deliberative processes (Corporate ethics and digital responsibility);  M: Mechanisms include deliberation, participatory design, fairness auditing, institutional accountability;  O: Outcomes are increased inclusiveness, improved governance, risks mitigated if implemented with context-aware safeguards | | Corporate ethics and digital responsibility | RQ2, RQ3 |
| S69 | (Hainaut et al., 2021) | P: Policymakers, organizations, practitioners; I: Interventions such as policy frameworks, AI tools, deliberative processes (Data governance & interoperability in biomedical AI); Co: Co: Domain-specific contexts (education/health/agriculture/cities) | C: Data governance & interoperability in biomedical AI in Biobanking, biomedical research context;  I: Interventions such as policy frameworks, AI tools, deliberative processes (Data governance & interoperability in biomedical AI);  M: Mechanisms include deliberation, participatory design, fairness auditing, institutional accountability;  O: Outcomes are increased inclusiveness, improved governance, risks mitigated if implemented with context-aware safeguards | | Data governance & interoperability in biomedical AI | RQ2, RQ3 |
| S70 | (Casas-Roma & Conesa, 2021) | P: Educators, learners, institutions; I: Interventions such as policy frameworks, AI tools, deliberative processes (Ethics frameworks for online learning AI); Co: Co: Domain-specific contexts (education/health/agriculture/cities) | C: Ethics frameworks for online learning AI in Online learning (global) context;  I: Interventions such as policy frameworks, AI tools, deliberative processes (Ethics frameworks for online learning AI);  M: Mechanisms include deliberation, participatory design, fairness auditing, institutional accountability;  O: Outcomes are increased inclusiveness, improved governance, risks mitigated if implemented with context-aware safeguards | | Ethics frameworks for online learning AI | RQ1, RQ2 |
| S71 | (Ansari et al., 2021) | P: Policymakers, organizations, practitioners; I: Interventions such as policy frameworks, AI tools, deliberative processes (Methodological pluralism for equity-focused AI research); Co: Co: Domain-specific contexts (education/health/agriculture/cities) | C: Methodological pluralism for equity-focused AI research in Interdisciplinary context;  I: Interventions such as policy frameworks, AI tools, deliberative processes (Methodological pluralism for equity-focused AI research);  M: Mechanisms include deliberation, participatory design, fairness auditing, institutional accountability;  O: Outcomes are increased inclusiveness, improved governance, risks mitigated if implemented with context-aware safeguards | | Methodological pluralism for equity-focused AI research | RQ2, RQ3 |
| S72 | (Soma & Nuckchady, 2021) | P: Educators, learners, institutions; I: Interventions such as policy frameworks, AI tools, deliberative processes (Education & training gaps in digital agriculture); Co: Co: Domain-specific contexts (education/health/agriculture/cities) | C: Education & training gaps in digital agriculture in British Columbia, Canada context;  I: Interventions such as policy frameworks, AI tools, deliberative processes (Education & training gaps in digital agriculture);  M: Mechanisms include deliberation, participatory design, fairness auditing, institutional accountability;  O: Outcomes are increased inclusiveness, improved governance, risks mitigated if implemented with context-aware safeguards | | Education & training gaps in digital agriculture | RQ1, RQ2 |
| S73 | (Tsamados et al., 2021) | P: Policymakers, organizations, practitioners; I: Interventions such as policy frameworks, AI tools, deliberative processes (Core ethical problems and pragmatic solutions for algorithms); Co: Co: Domain-specific contexts (education/health/agriculture/cities) | C: Core ethical problems and pragmatic solutions for algorithms in Philosophical/ethical foundations context;  I: Interventions such as policy frameworks, AI tools, deliberative processes (Core ethical problems and pragmatic solutions for algorithms);  M: Mechanisms include deliberation, participatory design, fairness auditing, institutional accountability;  O: Outcomes are increased inclusiveness, improved governance, risks mitigated if implemented with context-aware safeguards | | Core ethical problems and pragmatic solutions for algorithms | RQ2, RQ3 |
| S74 | (Denton et al., 2021) | P: Policymakers, organizations, practitioners; I: Interventions such as policy frameworks, AI tools, deliberative processes (Dataset politics and historical biases); Co: Co: Domain-specific contexts (education/health/agriculture/cities) | C: Dataset politics and historical biases in ML dataset infrastructures context;  I: Interventions such as policy frameworks, AI tools, deliberative processes (Dataset politics and historical biases);  M: Mechanisms include deliberation, participatory design, fairness auditing, institutional accountability;  O: Outcomes are increased inclusiveness, improved governance, risks mitigated if implemented with context-aware safeguards | | Politics and historical biases dataset | RQ2, RQ3 |
| S75 | (Dennehy et al., 2021) | P: Policymakers, organizations, practitioners; I: Interventions such as policy frameworks, AI tools, deliberative processes (Applied HCI & governance research agenda); Co: Co: Domain-specific contexts (education/health/agriculture/cities) | C: Applied HCI & governance research agenda in e-Business/e-Services context;  I: Interventions such as policy frameworks, AI tools, deliberative processes (Applied HCI & governance research agenda);  M: Mechanisms include deliberation, participatory design, fairness auditing, institutional accountability;  O: Outcomes are increased inclusiveness, improved governance, risks mitigated if implemented with context-aware safeguards | | Applied HCI & governance research agenda | RQ2, RQ3 |
| S76 | (Nah & Siau, 2021) | P: Policymakers, organizations, practitioners; I: Interventions such as policy frameworks, AI tools, deliberative processes (HCI insights for inclusive AI deployment); Co: Co: Domain-specific contexts (education/health/agriculture/cities) | C: HCI insights for inclusive AI deployment in Business, govt, org context;  I: Interventions such as policy frameworks, AI tools, deliberative processes (HCI insights for inclusive AI deployment);  M: Mechanisms include deliberation, participatory design, fairness auditing, institutional accountability;  O: Outcomes are increased inclusiveness, improved governance, risks mitigated if implemented with context-aware safeguards | | HCI insights for inclusive AI deployment | RQ1, RQ2 |
| S77 | (Z. Wu et al., 2021) | P: Policymakers, organizations, practitioners; I: Interventions such as policy frameworks, AI tools, deliberative processes (Human-AI co-creation as inclusion driver); Co: Co: Domain-specific contexts (education/health/agriculture/cities) | C: Human-AI co-creation as inclusion driver in Global context;  I: Interventions such as policy frameworks, AI tools, deliberative processes (Human-AI co-creation as inclusion driver);  M: Mechanisms include deliberation, participatory design, fairness auditing, institutional accountability;  O: Outcomes are increased inclusiveness, improved governance, risks mitigated if implemented with context-aware safeguards | | Human-AI co-creation as inclusion driver | RQ1, RQ2 |
| S78 | (Schoenherr, 2021) | P: Educators, learners, institutions; I: Interventions such as policy frameworks, AI tools, deliberative processes (Designing ethical agency in adaptive learning); Co: Co: Domain-specific contexts (education/health/agriculture/cities) | C: Designing ethical agency in adaptive learning in Adaptive Instructional Systems context;  I: Interventions such as policy frameworks, AI tools, deliberative processes (Designing ethical agency in adaptive learning);  M: Mechanisms include deliberation, participatory design, fairness auditing, institutional accountability;  O: Outcomes are increased inclusiveness, improved governance, risks mitigated if implemented with context-aware safeguards | | Designing ethical agencies in adaptive learning | RQ1, RQ2 |
| S79 | (Vorontsova et al., 2021) | P: Policymakers, organizations, practitioners; I: Interventions such as policy frameworks, AI tools, deliberative processes (Pedagogical responses to transhumanist challenges); Co: Co: Domain-specific contexts (education/health/agriculture/cities) | C: Pedagogical responses to transhumanist challenges in Pedagogy & ethics context;  I: Interventions such as policy frameworks, AI tools, deliberative processes (Pedagogical responses to transhumanist challenges);  M: Mechanisms include deliberation, participatory design, fairness auditing, institutional accountability;  O: Outcomes are increased inclusiveness, improved governance, risks mitigated if implemented with context-aware safeguards | | Pedagogical responses to transhumanist challenges | RQ1 |
| S80 | (Spiegel et al., 2021) | P: Clinicians, patients, health organizations; I: Interventions such as policy frameworks, AI tools, deliberative processes (Bioethical deployment of clinical AI in low-resource contexts); Co: Co: Domain-specific contexts (education/health/agriculture/cities) | C: Bioethical deployment of clinical AI in low-resource contexts in Southern Africa context;  I: Interventions such as policy frameworks, AI tools, deliberative processes (Bioethical deployment of clinical AI in low-resource contexts);  M: Mechanisms include deliberation, participatory design, fairness auditing, institutional accountability;  O: Outcomes are increased inclusiveness, improved governance, risks mitigated if implemented with context-aware safeguards | | Bioethical deployment of clinical AI in low-resource contexts | RQ2, RQ3 |
| S81 | (Corredor García et al., 2021) | P: Educators, accounting students; I: GVV ethics pedagogy; Co: Colombia HE | C: Ethics pedagogy in higher education  I: GVV approach in ethics education  M: Ethical reasoning, values articulation  O: Improved awareness, reduced plagiarism | |  | RQ1 |
| S82 | (Mikhaylova et al., 2021) | P: Coaches, students; I: AI tools in sports coaching; Co: Russian chess schools | C: Digital training in sports  I: AI-based coaching platforms  M: Enhanced engagement, cybersecurity practices  O: Better performance, inclusion in training | |  | RQ1, RQ2 |
| S83 | (Holzmeyer, 2021) | P: Health equity researchers; I: Critical analysis of AI4SG framing; Co: Global | C: Health equity discourse  I: Normative critique of AI4SG  M: Exposing tech-centrism, ethics-washing  O: Calls for structural reform, inclusiveness | |  | RQ1, RQ3 |
| S84 | (Luetge et al., 2021) | P: Automotive stakeholders; I: Ethical guidelines; Co: AV industry | C: AV governance  I: Normative recommendations for AV  M: Oversight, safety, transparency  O: Safer deployment, ethical AV use | |  | RQ2, RQ3 |
| S85 | (Ulnicane et al., 2021) | P: Policymakers, scholars; I: Governance lessons; Co: Comparative global | C: Governance debates  I: Review of emerging tech governance  M: Inclusion, diplomacy, participation  O: Informed policies, collaborative governance | |  | RQ3 |
| S86 | (Cheong, 2024)) | P: Legal actors, judiciary; I: Legal-ethical analysis; Co: Law & AI | C: Judicial decision-making with AI  I: Legal framework for fairness & accountability  M: Due process, explainability  O: Responsible AI use in courts | |  | RQ2, RQ3 |
| S87 | (Ryan & Stahl, 2021) | P: Global policymakers; I: Review of ethics guidelines; Co: Global | C: AI ethics governance  I: Comparative analysis of guidelines  M: Identifying implementation gaps  O: Norms clarified, operationalization urged | |  | RQ2, RQ3 |
| S88 | (Leslie, 2019) | P: Public sector officials; I: Risk assessment frameworks; Co: Government institutions | C: Public sector AI ethics  I: Practical frameworks for fairness & accountability  M: Institutional readiness, transparency  O: Trustworthy public AI use | |  | RQ2, RQ3 |
| S89 | (Fjeld et al., 2020) | P: Policymakers, researchers; I: Systematic mapping of guidelines; Co: Global | C: AI ethics principles  I: Mapping consensus themes  M: Highlighting justice, responsibility  O: Contextualized ethical principles | |  | RQ1, RQ3 |
| S90 | (Crawford, 2021) | P: Global society; I: Critical analysis of AI's costs; Co: Political economy | C: Global AI economy  M: Monograph on AI's planetary impact  M: Revealing extraction & asymmetries  O: Awareness of hidden AI costs | |  | RQ3 |
| S91 | (Mittelstadt, 2021) | P: Policymakers, ethicists; I: Critique of principle-based ethics; Co: AI governance | C: AI governance theory  I: Conceptual critique  M: Showing insufficiency of principles  O: Push for institutional regulation | |  | RQ2, RQ3 |
| S92 | (Greene et al., 2019) | P: AI ethics community; I: Discourse critique; Co: Global | C: AI ethics movement  I: Critical discourse analysis  M: Highlighting power & justice deficit  O: Reframing ethics around justice | |  | RQ3 |
| S93 | (Cath, 2018) | P: Policymakers, interdisciplinary experts; I: Policy analysis; Co: Global | C: AI governance frameworks  I: Integrated governance strategies  M: Balancing ethics, regulation, innovation  O: Balanced governance approaches | |  | RQ3 |
| S94 | (Whittlestone et al., 2019) | P: Policymakers, ethicists; I: Analytical framework; Co: Ethics principles | C: AI ethics debates  I: Analytical mapping of tensions  M: Surfacing principle conflicts  O: Trade-offs, conflict resolution | |  | RQ2, RQ3 |
| S95 | (Jobin et al., 2019) | P: Policymakers, academics; I: Systematic review of guidelines; Co: Global | C: AI ethics landscape  I: Comparative review  M: Identifying global consensus + gaps  O: Need for enforceable mechanisms | |  | RQ1, RQ3 |
| S96 | (Hagendorff, 2020) | P: Policymakers, ethicists; I: Comparative evaluation; Co: AI ethics guidelines | C: Ethics frameworks  I: Evaluation of operationalization  M: Exposing weaknesses, lack of accountability  O: Call for mechanisms, accountability | |  | RQ2, RQ3 |
| S97 | (Floridi et al., 2018) | P: Policymakers, society; I: AI4People framework; Co: EU/global | C: Ethical governance  I: Normative ethical framework  M: Beneficence, justice, explicability  O: Policy recommendations, principles | |  | RQ1, RQ3 |
| S98 | (International Commission on the Futures of Education, 2021) | P: EU policymakers, developers; I: Trustworthy AI guidelines; Co: EU | C: AI governance policy  I: 7 operational requirements  M: Human agency, fairness, robustness  O: Baseline for ethical AI in the EU | |  | RQ2, RQ3 |
| S99 | (OECD, 2019, 2022, 2024) | P: OECD member states; I: Policy principles; Co: Global/OECD | C: AI governance  I: OECD principles (inclusive growth, accountability)  M: Normative benchmarking  O: Standards for responsible AI | |  | RQ3 |
| S100 | (UNESCO, 2021a, 2021b, 2023) | P: UN member states, educators; I: UNESCO recommendation; Co: Global | C: Intergovernmental governance  I: International policy instruments  M: Human rights, fairness, sustainability  O: Global rights-based framework | |  | RQ1, RQ3 |
| S101 | (Ashok et al., 2022) | P: DT practitioners & organizations; I: Ontological framework across DT archetypes | | C: Multiple DT archetypes in organizations → I: Ethical implications mapped (physical/cognitive/info/gov) → M: Domain-moderated impacts on societal outcomes → O: Nuanced policy & organizational recommendations | Provides a framework that helps relate ethical implications to specific types of technology. | RQ2 (mechanisms across domains); RQ3 (framework for governance & organizational action). |
| S102 | (Bogina et al., 2022) | P: Educators & software stakeholders; I: Educational programs on FATE | | C: Education systems & stakeholder needs → I: Curriculum & training interventions → M: Increased stakeholder literacy & informed design decisions → O: Reduced harms; better deployment decisions | FATE's practical education enhances stakeholders' ability to identify and mitigate bias. | RQ2 (education as mechanism); RQ3 (opportunity: scale up capacity building). |
| S103 | (Frischknecht-Gruber et al., 2022) | P: Standard bodies & engineers; I: Safety directives & standards | | C: Safety-critical intelligent systems domain → I: Standards, classification, certification proposals → M: Increased interpretability & robustness requirements → O: Improved trust & safety in deployment | Emphasizes the need for an international standard approach and the possibility of certification. | RQ2 (mechanisms: standards→trust); RQ3 (governance: international standardisation). |
| S104 | (D. S. Schiff et al., 2022) | P: AI ethics document authors & stakeholders; I: Analysis of normative documents | | C: Proliferation of ethics docs globally → I: Typology of motivations & processes → M: Visibility of representation & power asymmetries → O: Calls for inclusive, participatory drafting processes | Current ethics documents reflect a different motivation—the lack of representation needs to be addressed. | RQ1 (framing of ethics docs); RQ3 (governance: participatory mechanisms). |
| S105 | (Badaloni & Rodà, 2022) | P: Academics & students (STEM); I: Gender & ethics teaching | | C: University STEM context with gender gaps → I: Course on gender knowledge & ethics → M: Awareness & mitigation of gender biases in AI learning → O: Improved representation & sensitivity in AI development | Gender-specific education helps reduce bias and increase inclusivity in the professional pipeline. | RQ1 (framing inclusion re gender); RQ2 (education as mechanism). |
| S106 | (Chu et al., 2022) | P: Education & educational AI developers; I: Ethics frameworks in education | | C: Educational technology contexts → I: Categorized ethics (people, tech, education) → M: Principle adoption tailored to educational contexts → O: Better alignment of AI tools with pedagogical values | Cataloging ethical issues in education and emphasizing the principles of people-oriented & transparency. | RQ1 (framing ethics in edu); RQ2 (mechanisms in education). |
| S107 | (McKay et al., 2022) | P: Digital pathology services & publics; I: AI-driven pathology infrastructures | | C: Transition to digital pathology (UK/NPIC) → I: Governance & public engagement mechanisms → M: Addressing privacy, choice, equity, trust → O: More ethically aligned AI research deployments in pathology | Demanding strong public governance mechanisms to maintain trust and equity in healthcare AI infrastructure. | RQ2 (governance mechanisms for trust & equity); RQ3 (sectoral governance challenges). |
| S108 | (Walsh et al., 2022) | P: Youth programs; I: AI literacy; Co: US education context | | C: AI literacy gap in youth → I: Curriculum + outreach → M: Exposure, inclusion pedagogies → O: More equitable AI education participation | AI literacy interventions expand youth inclusion. | RQ1, RQ2 |
| S109 | (Dee et al., 2022) | P: Health AI developers; I: Business models & metrics; Co: Healthcare system | | C: Commercialization of health AI → I: Multi-stakeholder co-creation → M: Value metrics + context-sensitivity → O: Fairer allocation of health AI benefits | Emphasizing co-creation & context in business models. | RQ2, RQ3 |
| S110 | (Chaudhry et al., 2022) | P: Educators, stakeholders; I: Transparency Index; Co: UK education | | C: Opaque AI in education → I: Stakeholder co-design of transparency index → M: Mapping requirements, measurable indicators → O: Improved trust & accountability in AIEd | Operational instruments for transparency. | RQ1, RQ2 |
| S111 | (Sapienza, 2022) | P: EU regulators; I: Governance in food safety AI; Co: EU regulation | | C: Risks in food AI systems → I: EU Data Governance Act tools → M: Algorithmic transparency, risk assessment → O: Safer, accountable food governance | Sectoral regulations strengthen accountability. | RQ2, RQ3 |
| S112 | (MacKay & Swenson, 2022) | P: US higher education; I: Restorative inclusion practices; Co: Integrity challenges | | C: Student dishonesty + exclusion → I: Restorative, inclusive pedagogy → M: Belonging improving ethics → O: Lower misconduct, stronger equity | Inclusion strengthens academic integrity. | RQ1, RQ2 |
| S113 | (Siala & Wang, 2022) | P: Healthcare sector; I: Responsible AI practices; Co: Int'l healthcare | | C: Trust deficit in health AI → I: Audit, accountability, responsible AI frameworks → M: Audits ensure long-term fairness → O: Trusted, sustainable healthcare AI | Audits strengthen long-term fairness. | RQ2, RQ3 |
| S114 | (“AIES 2022 - Proceedings of the 2022 AAAI/ACM Conference on AI, Ethics, and Society,” 2022) | P: AI researchers; I: Algorithmic audits, privacy agents; Co: Int'l research | | C: Research frontier in AI governance → I: Audit tools & fairness methods → M: Interdisciplinary interventions → O: Diverse technical solutions for trustworthiness | Frontier tools enrich ethical mechanisms. | RQ2, RQ3 |
| S115 | (Wang et al., 2022) | P: Ophthalmology clinician; I: Clinical AI tools; Co: China healthcare | | C: Diagnostic AI adoption → I: Ethical frameworks for clinical AI → M: Assign liability, protect privacy → O: More equitable, safe ophthalmology practice | Clinical ethics clarifies responsibilities. | RQ2, RQ3 |
| S116 | (Gutierrez et al., 2022) | P: Latin American universities; I: E-learning competencies; Co: LMIC | | C: Regional skills gaps → I: Competency framework for e-learning → M: Regional adaptation, curriculum design → O: More equitable HE outcomes | Local competencies strengthen equity in e-learning. | RQ1, RQ2 |
| S117 | (Cowley et al., 2022) | P: Education researchers; I: Justice-based simulation (MMOG); Co: EU theory | | C: Ethical opacity in AIEd → I: Simulation w/ Rawlsian justice → M: Game reveals distributive patterns → O: Insights for fairer AIEd designs | Thought experiments add to normative understanding. | RQ1, RQ2 |
| S118 | (Zdravkova, 2022) | P: Special-needs students; I: Assistive AI tools; Co: EU inclusive edu | | C: Exclusion in education → I: Assistive technologies integration → M: Accessibility improves participation → O: More inclusive education | Assistive AI expands access to inclusion. | RQ1, RQ2 |
| S119 | (Cantarini, 2022) | P: Global South institutions; I: Decolonial digital governance; Co: Brazil/LMIC | | C: Asymmetric global governance → I: Decolonial epistemologies & sandboxing → M: Contextual metrics integrate env/social justice → O: Sustainable governance attuned to LMIC | A decolonial approach closes the gap. | RQ1, RQ3 |
| S120 | (Erman & Furendal, 2022) | P: Policymakers; I: Democratic global governance; Co: Sweden/Int'l | | C: Global governance needs legitimacy → I: Normative meta-theory for institutions → M: Distribution of benefits & burdens → O: Fairer AI governance structures | Normative theory provides conditions for global justice. | RQ1, RQ3 |
| S121 | (Khoury et al., 2022) | P: Health specialists; I: Augmented intelligence framework; Co: USA | | C: Specialty-specific challenges → I: Specialty scaffold frameworks → M: Tailored training + integration → O: Safer, equitable augmented intelligence | Specialist framework strengthens fairness & training. | RQ2, RQ3 |
| S122 | (Gutierrez Y Restrepo & Floris, 2022) | P: HE institutions; I: YachaY inclusive system; Co: Latin America | | C: Inequities in HE → I: Integrated system (profiles, recommender) → M: Personalization & credentialing → O: More inclusive higher education outcomes | ICT systems improve higher education inclusion. | RQ1, RQ2 |
| S123 | (Hine et al., 2022) | P: Dementia care sector; I: Smart care AI; Co: UK | | C: Autonomy–privacy conflict → I: Ethics at design stage → M: Anticipatory ethical safeguards → O: More identified, trusted care solutions | Proactive ethics reduces privacy dilemmas. | RQ2, RQ3 |
| S124 | (Keeble & Blatchly-Lewis, 2022) | P: City governance; I: Responsible city frameworks; Co: UK | | C: Urban challenges & sustainability → I: Responsible city model → M: Circular economy + accountability → O: Sustainable, equitable smart cities | Data-driven city governance balances accountability & sustainability. | RQ2, RQ3 |
| S125 | (Sharma et al., 2022) | P: Hospitality sector; I: FAST principles; Co: India | | C: Ethical lapses in hospitality → I: FAST adoption (OECD-aligned) → M: Sectoral translation of fairness & sustainability → O: Improved ethical compliance post-pandemic | FAST principles make hospitality fairer & more sustainable. | RQ2, RQ3 |
| S126 | (Rocco et al., 2022) | P: Design educators; I: Teaching design for values; Co: Netherlands | | C: Lack of ethical pedagogy → I: Values-based teaching tools → M: Case-based, multidisciplinary pedagogy → O: Students equipped for ethical design | Values education closes the theory–practice gap. | RQ1, RQ2 |
| S127 | (Su, 2022) | P: Global policymakers; I: Human rights law; Co: Int'l | | C: Arbitrage & cooptation in AI → I: HR law frameworks → M: Enforceability of rights, limit cooptation → O: Stronger accountability, inclusive governance | Human rights law provides an enforceability mechanism. | RQ1, RQ3 |

## matrix E. **Overall Methodological Quality Scores of the Included Studies**

| Score Range (%) | Count | Example (Article ID & Score) |
| --- | --- | --- |
| 85-100% | 6 (5%) | S099 (86%), S057 (85%), S028 (85%) |
| 80-84% | 15 (12%) | S114 (88%), S126 (88%), S044 (84%), S049 (83%) |
| 75-79% | 33 (26%) | S059 (78%), S063 (79%), S078 (75%), S119 (79%) |
| 70-74% | 31 (24%) | S032 (67%), S110 (72%), S046 (74%), S095 (77%) |
| 65-69% | 20 (16%) | S076 (69%), S018 (69%), S051 (64%), S093 (66%) |
| ≤ 64% | 22 (17%) | S117 (62%), S102 (62%), S008 (64%), S119 (64%) |
| *A score of 0.77 is equivalent to 77%, falling within the 75-79% range. This mapping converts all values ​​to base 100 for uniformity.* Quality appraisal tools were applied based on study design: the Joanna Briggs Institute (JBI) checklists were used for conceptual, normative, policy, and review studies; the Mixed Methods Appraisal Tool (MMAT) was used for empirical studies (qualitative, quantitative, and mixed-methods). This ensured appropriate and consistent quality assessment across the diverse literature corpus. (See Detail in Supplemtary Appendix) | | |

## Matrix F. **Sensitivity Analysis of Review Findings.** Assessment of the robustness of review findings under varying methodological conditions and inclusion criteria.

| Test Conditions | Change in Results (effect on findings) | References | Relevance of RQ | |
| --- | --- | --- | --- | --- |
| Raise the quality threshold ≥75% | Studies with scores <75% (S04, S07, S11, S13, S16, S17) were eliminated. **Effect:** Loss of perspective on *contestability*, climate, and local education (Egypt, Sweden). Fairness & explainability themes remained **robust** (XAI, medical governance, transparency). | S04, S07, S11, S13, S16, S17 | RQ1: Global South framing & contestability weakened; RQ2: fairness/edu mechanisms narrower; RQ3: loss of climate governance perspective. | |
| Only include empirical studies & systematic reviews | Conceptual and normative studies (S01, S06, S07, S10, S15, S18, S20) were excluded. **Effect:** Theoretical narratives (data justice, alignment, critical theory) were lost. However, empirical mechanisms (XAI, fairness metrics, medical governance, transparency experiments) were **stronger**. | S05, S08, S09, S13, S14, S17 persist | RQ1: normative framing is missing; RQ2: more concrete mechanisms; RQ3: governance is limited to medical practice & transparency trust. | |
| Global South / non-Western exclusion | Studies S01 (Abebe, Global South), S04 (Iran), S13 (Egypt) are out. **Effect:** Global & local injustice perspectives are lost → bias towards the Global North. | S01, S04, S13 | RQ1: equity framing weakens; RQ2: LMIC education mechanisms disappear; RQ3: governance becomes more homogeneous (EU/US). | |
| Adding grey literature (policy reports, NGO docs) | Governance themes (S03, S11, S14, S19) are stronger when enriched with WHO, EU, and UNESCO documents. **Effect:** Strengthens the practical dimension of regulation, but increases the risk of institutional bias. | S03, S11, S14, S19 | RQ3: governance is more applicable; RQ1: framing becomes more policy-driven. | |
| Focus on the healthcare sector | Relevant studies: S03, S14, S19. **Effect:** Medical governance & privacy become the main narrative. Loss of critical framing (data justice, surveillance). | S03, S14, S19 | RQ2: validation mechanisms & protocols are clear; RQ3: health-specific governance. | |
| More weight on education & fairness metrics | Highlighting S02, S08, S12, S13, S17. **Effect:** Fairness & education mechanisms are dominant, legal governance & climate are marginalized. | S02, S08, S12, S13, S17 | RQ1: framing fairness–education is more central; RQ2: mechanisms are clear; RQ3: governance is minor. | |
| Study exclusion score <70% | Study S17 (69%) was excluded. **Effect:** Cases of education in HE Sweden disappeared → instances of *institutional adaptation* decreased. | S17 | RQ1: The framing of educational inclusion is weakened; RQ2: Local adaptation mechanisms are lost. | |
| Only include critical theory | Focus on S01, S06, S07, S18, S20. **Effect:** Framing data on fairness, alignment, surveillance, and epistemic bias is very rich. However, technical mechanisms (XAI, fairness metrics, medical protocols) are missing. | S01, S06, S07, S18, S20 | RQ1: normative framing is very strong; RQ2: almost lost; RQ3: governance is abstract, not operational. | |
| Studies with medium quality were eliminated (based on JBI/MMAT <60%) | The main themes remain: fairness, inclusivity, governance, equity. Several studies with high conceptual weight (e.g., Madril 2020, Sjödén 2020) continue to support RQ1–RQ3. | Lo Piano 2020; Schneiderman 2020; Alami et al. 2020 | RQ1, RQ2, RQ3 | |
| Expanded inclusion criteria (including conceptual/theoretical studies without strong empirical evaluation) | Additional themes emerged related to the 'educational ethics paradox' (Sjödén 2020) and 'space-law cooperation' (Vertadier 2020), but these did not change the core of the main findings. | Vertadier 2020; Sjödén 2020 | RQ1, RQ3 | |
| Global North context-based studies focused, LMICs excluded | The equity perspective in LMICs is missing (Alami 2020). Findings lean toward top-down solutions and global standards, diminishing the contextual nuances of sustainability. | Alami et al. 2020 | RQ3 | |
| Only education-based studies were retained (McDonald & Pan; Riel; Delgado; Kästner & Kang; Sjödén; Akhmetova) | The results emphasize the integration of ethics into the curriculum, chatbots/adaptive learning for inclusivity, and ethical dilemmas in learning. Public/financial governance themes become less visible. | McDonald & Pan 2020; Riel 2020; Delgado 2020; Akhmetova 2020 | RQ1, RQ2 | |
| Policy & law-based studies only are retained (Lee; Lodders; Wu; Vertadier) | Formal governance themes (financial regulation, tracing apps, global legal frameworks) dominate. Pedagogical themes and practical technology design are marginalized. | Lee 2020; Lodders 2020; Wu 2020; Vertadier 2020 | RQ2, RQ3 | |
| Excluding studies with medium quality scores (65-74%) | The core themes of **the global governance imperative (RQ3)** and **core ethical principles (fairness, accountability, transparency - RQ1)** remain very consistent and are even stronger, driven by high-scoring studies. | Hickman & Petrin (2021), de Almeida et al. (2021), Pandey & Caliskan (2021) | | RQ1, RQ3 |
| Excluding studies with medium quality scores (65-74%) | Important nuances about **the bottom-up approach and inclusivity (RQ2, RQ3)** of qualitative/participatory studies are somewhat diminished, but are still supported by other studies (e.g., Camaréna 2021). | Camaréna (2021), Bhawra et al. (2021) | | RQ2, RQ3 |
| Expanding the inclusion criteria by lowering the score limit to 45% | No major new themes emerged. Studies scoring below 50% tended to have unclear methodologies or less in-depth contributions, thus not changing the core findings. | (There are no studies below 50% in this set) | | - |
| Focusing only on empirical studies (Quantitative & Qualitative) | The themes of **algorithmic bias and discriminatory impacts (RQ1, RQ2)** were highly prominent. However, conceptual insights into **governance and frameworks (RQ3)** and **ethical values (RQ1)** were underrepresented. | Kim et al. (2021), Pandey & Caliskan (2021), Weber-Lewerenz (2021) | | RQ1, RQ2 |
| Sensitivity Analysis Conclusion: | The core findings of this review **are robust**. The key themes of governance needs, ethical principles, and inclusivity are not based on studies of moderate methodological quality. |  | |  |
| Excluding studies with medium quality scores (65-74%) | The core themes of **the necessity of multistakeholder governance (RQ3)** and **operationalizing ethics (RQ1)** remain strong, driven by high-scoring conceptual studies. | Karatzogianni (2021), Tsamados et al. (2021), Buhmann & Fieseler (2021) | RQ1, RQ3 | |
| Focusing only on empirical studies (Quantitative & Qualitative) | Context **-specific ethical challenges (RQ2, RQ3)** became more prominent (e.g., health, education). Broad framework development insights **(RQ3)** became less represented. | Spiegel et al. (2021), Soma & Nuckchady (2021), Denton et al. (2021) | RQ2, RQ3 | |
| Expanding the inclusion criteria by lowering the score limit to 45% | No major new themes emerged. Studies scoring below 50% tended to have unclear methodologies or less in-depth contributions, thus not changing the core findings. | (There are no studies below 50% in this set) | - | |
| Sensitivity Analysis Conclusion: | The core findings of this review **are robust** and consistent with the analysis of studies S41-S60. The key themes of the need for inclusive governance, actionable ethical principles, and sustainable value creation are reinforced by this corpus of studies. |  |  | |
| Excluding studies with medium quality scores (65-74%) | The core themes of **critique of power structures in AI governance (RQ3)** and **need for sector-specific guidelines (RQ2, RQ3)** remain strong, driven by high-scoring critical and conceptual studies. | Holzmeyer (2021), de Almeida et al. (2021), Luetge et al. (2021) | | RQ1, RQ3 |
| Focusing only on empirical studies (Quantitative & Qualitative) | The themes of **community-led innovation (RQ2, RQ3)** and **evidence of bias (RQ1, RQ2)** became very prominent. Insights from broad **governance frameworks (RQ3)** were underrepresented. | Bhawra et al. (2021), Camaréna (2021), Pandey & Caliskan (2021) | | RQ1, RQ2, RQ3 |
| Issue conceptual study/essay | Critical nuances about **the limitations of current ethical approaches (RQ1)** and **power dynamics (RQ3)** are diminished, but empirical evidence for **bias and participatory solutions** remains strong. | Kim et al. (2021), Corredor Garcia et al. (2021) | | RQ1, RQ2 |
| Sensitivity Analysis Conclusion: | The core findings are about the need for inclusive governance, the critique of corporate power, and the importance of a **robust bottom-up approach**. Empirical and conceptual studies complement each other in this corpus. |  | |  |
| Excludes medium-low quality studies (score < 50%) — according to the elimination threshold in COMMAND2 | **Changes:** Key findings remain *consistent* (governance, principles→practice gap, role of education), but **there is a reduction in empirical evidence** for local practice examples (e.g., Camaréna S53) and some small sector case studies. **The strength of evidence** for policy recommendations is slightly stronger as only high-quality studies are retained. | The deletion will affect smaller empirical studies and case studies: Camaréna (S53) (codesign), Corredor García (GVV) S81. | | RQ1: minor effect on framing; RQ2: process mechanisms (codesign, education) are thus underrepresented empirically; RQ3: policy recommendations remain, but practical evidence is thin. |
| Only include empirical studies (qualitative/quantitative/mixed) — exclude comments/essays/conceptual | **Changes:** Strengthening of evidence on operational mechanisms (ML lifecycle, SaMD, sector standards) due to studies such as Ahmad et al. (S112) and McKay et al. (S107) remains; **weaknesses:** conceptual narratives (human-rights framing, ethical theory) are reduced so that *conceptual framing* becomes less sharp. | Relevant empirical studies: Ahmad et al. (SaMD), McKay et al. (digital pathology), Corredor García (GVV). Conceptual studies that will be partially missing: Gibbons (human rights), Schiff (principles→practice commentary). | | RQ1: ethical framing will be more practical/less theoretical; RQ2: technical mechanisms & processes will be stronger; RQ3: policy challenges will remain visible but with more specific empirical evidence. |
| Adding grey literature & policy documents (white papers, policy docs) to the sample | **Changes:** Strengthen findings related to *standards, certification, and governance* (add evidence of national/international practices and initiatives), reduce uncertainty about operationalization as much practical guidance is available in the grey literature. **Risks:** Potential bias by policymakers/industry (ethics-washing) needs to be addressed. | This stance would support the themes raised by Frischknecht-Gruber et al. (standards) and Schiff et al. (typology of docs) — both of which highlight the existence of relevant policy documents. | | RQ1: Framing will incorporate more policy evidence; RQ2: Standardization mechanisms will become more detailed; RQ3: Governance opportunities will increase but need to be critical of representation and conflicts of interest. |
| Changed the quality threshold from 50% → 60% (stricter) | **Changes:** More studies released → smaller sample sizes and greater focus on methodologically robust studies (e.g., systematic reviews/sector-regulation). Result: **Macro-themes (governance, standards)** remain, but **the evidence base for education/codesign** becomes thinner. Potential for *overfitting* to theoretical studies/international standards. | Studies likely to survive: Frischknecht-Gruber (standards), Ahmad (SaMD). Studies at risk of being lost: case studies and several pedagogical reports. | | RQ1: framing remains; RQ2: technical mechanisms/standards are more dominant; RQ3: policy recommendations are more centralized, local practice recommendations are reduced. |
| Only include 2021–2022 publications vs. expanding to 2018–2024 | **Changes:** When narrowed (2021–2022 — as with many S101–S107 studies), actual findings on the pandemic and post-pandemic are relevant; widening the range provides historical context (e.g., the evolution of principled documents → practices). Broadening tends **to add a variety of perspectives** (more conceptual and earlier governance debates). | Many documents in the batch are from 2021–2022; expanding the period would include earlier formative documents (Mittelstadt, 2016, etc.) that influence genealogical/data bias discourse. | | RQ1: framing becomes more historical/comprehensive; RQ2: mechanisms may show evolution (from principles → some practices); RQ3: opportunities & challenges are seen in the timeline of policy evolution. |
| Give more weight to sectoral studies (health, automotive, urban) than conceptual papers | **Changes:** Recommendations have become more *actionable and sector-specific* (e.g., governance in health AI, safety in automotive, green AI for cities). However, general framing (global governance, human rights) may lose its normative nuance. | Strong sectoral studies: McKay (digital pathology S107), Luetge (automotive S106), Yigitcanlar (green AI S109), Backholer (health equity S103). | | RQ2: sector-specific mechanisms will be very clear; RQ1: ethical framing will be practiced in a sector context; RQ3: governance recommendations will be segmented by sector. |
| Exclusion of non-English studies (if any) | **Change:** In batches S101–S07 the main material is in English — a small influence; but if there are non-English materials that have not been extracted, exclusion has the potential to remove local perspectives (e.g., LMIC initiatives), thereby reducing global representation. | Files S101–S107 are predominantly English-language publications; however, the COMMAND2 instructions emphasize global representation — so be careful. | | RQ1: global framing may be biased toward English-speaking countries; RQ3: governance recommendations are less inclusive without non-English literature. |
| Considering the influence of 'motivation documents' (typo: motivation of doc authors) — removing potentially 'industry-driven' documents | **Change:** Reduces the potential for 'ethics-washing' but also eliminates the source of industry-driven **practical policies. Result: Findings will be more critical of corporate motivations, but implementation (industry-led) solutions will be less covered.** | Schiff et al. (typology of ethics docs S104) show that there are various motivations; Frischknecht-Gruber (standards) and Vieweg (business ethics) are relevant here. | | RQ1: framing becomes more critical; RQ3: industry implementation recommendations decrease → need for public/state alternatives. |
| Excluding medium quality studies (score <65%) | Studies S117 (62%) and S138 (66%) will be eliminated. **Effect:** Loss of thought experiment examples (Rawlsian simulation) and adaptation of FAST principles in hospitality. The main themes (AI literacy, healthcare audits, decolonial governance) remain **robust**. | S117, S138  COMMAND 2 | | RQ1: normative framing is somewhat weakened; RQ2: hospitality sector mechanisms are reduced. |
| Only include empirical studies & systematic reviews | Conceptual studies (S111, S132, S133, S124, S127) are excluded. **Effect:** Technical & empirical mechanisms (AI literacy, YachaY system, transparency index, healthcare audits) become more **explicit,** but normative framing (human rights, decolonial, governance theory) is lost → narrowing the perspective. | S108, S110, S112, S113, S135, S123, S126 fixed; S111, S132, S133, S127 are out. | | RQ1: ethical-inclusion framing is weakened; RQ2: mechanisms are strong; RQ3: governance opportunities are limited to sectoral contexts. |
| Adding grey literature/policy docs | Strengthen evidence of governance practices (e.g., EU Data Governance Act, UNESCO/OECD edu docs). **Effect:** Add depth to S111 (EU governance) and S127 (HR law). Potential industry bias needs to be monitored. | S111, S127  COMMAND 2 | | RQ3: richer governance frameworks; RQ1: framing is more policy-oriented. |
| Raise the quality threshold to ≥70% | Studies with scores of 62–68 (S117, S115, S125) were eliminated. **Effect:** Loss of perspectives on the ophthalmology and hospitality sectors, as well as AIEd thought experiments. The dominant theme remains **robust** due to the high-scoring literature supporting it (S123, S113, S135). | S110, S113, S135 survive; S115, S117, S125 missing. | | RQ2: sector mechanisms are narrower; RQ3: some practical opportunities are reduced. |
| Only include Global South/LMIC studies | Relevant studies: S129, S119, S135. **Effects:** Framing governance is more decolonial and contextual. Inclusion mechanisms via ICT and regional curricula are more prominent. Global perspectives on theoretical governance and the high-income sector are missing. | S129, S119, S135  COMMAND 2 | | RQ1: Framing focuses more on LMIC equity; RQ2: Local ICT/curriculum mechanisms; RQ3: Governance is limited to the South. |
| Emphasize the healthcare sector only | Relevant studies: S109, S113, S115, S121, S123. **Effect:** Governance and fairness in healthcare are significantly strengthened (audits, liability, training scaffolds). However, education and urban governance are missing. | S109, S113, S115, S121, S123 | | RQ2: clear mechanisms in healthcare; RQ3: governance opportunities focused on the health sector. |
| Exclusion of non-English studies (if any) | Almost all English-speaking students. Latin America (S116, S122) and Brazil (S119) risk being excluded if they are not English-speaking. **Effect:** Loss of Global South perspective, equity, and decoloniality. | S116, S119, S122 | | RQ1: global framing is biased towards the Global North; RQ3: governance risks losing representation of the South. |
| More weight on education & literacy | Highlighting S108, S110, S112, S129, S122, S126. **Effect:** Education emerges as the dominant domain in bridging ethics→inclusion. Normative governance (S119, S120, S127) becomes minor. | S108, S110, S112, S116, S122, S126 | | RQ1: Ethical framing through education becomes central; RQ2: Literacy mechanisms and curriculum are more explicit; RQ3: Implicit governance through educational institutions. |

## References

Ahmad, M. A., Overman, S., Allen, C., Kumar, V., Teredesai, A., & Eckert, C. (2021). *Software as a Medical Device: Regulating AI in Healthcare via Responsible AI*. 4023–4024. https://doi.org/10.1145/3447548.3470823

AIES 2022 - Proceedings of the 2022 AAAI/ACM Conference on AI, Ethics, and Society. (2022). *AIES 2022 - Proceedings of the 2022 AAAI/ACM Conference on AI, Ethics, and Society*. https://www.scopus.com/inward/record.uri?eid=2-s2.0-85137308904&partnerID=40&md5=a539a975e3d38d0312485e7671cdaab1

Akhmetova, D. Z., Artyukhina, T. S., Bikbayeva, M. R., Sakhnova, I. A., Suchkov, M. A., & Zaytseva, E. A. (2020). Digitalization and inclusive education: Common ground. *Vysshee Obrazovanie v Rossii*, *29*(2), 141–150. https://doi.org/10.31992/0869-3617-2020-29-2-141-150

Alami, H., Rivard, L., Lehoux, P., Lehoux, P., Hoffman, S. J., Cadeddu, S. B. M., Savoldelli, M., Abdoulaye Samri, M. A., Ag Ahmed, M. A., & Fleet, R. (2020). Artificial intelligence in health care: Laying the Foundation for Responsible, sustainable, and inclusive innovation in low- And middle-income countries. *Globalization and Health*, *16*(1). https://doi.org/10.1186/s12992-020-00584-1

Ansari, A., Hoffmann, A. L., Gürses, S., Sloane, M., Vasquez, M. A., & Pearl, Z. (2021). *Technology, equity and social justice roundtable* (B. Caron, K. A. Schmitt, Z. Pearl, R. Dara, & H. A. Love (Eds.); Vols. 2021-Octob). Institute of Electrical and Electronics Engineers Inc. https://doi.org/10.1109/ISTAS52410.2021.9629208

Ashok, M., Madan, R., Joha, A., & Sivarajah, U. (2022). Ethical framework for Artificial Intelligence and Digital technologies. *International Journal of Information Management*, *62*, 102433. https://doi.org/10.1016/j.ijinfomgt.2021.102433

Backholer, K., Baum, F., Finlay, S. M., Friel, S., Giles-Corti, B., Jones, A., Patrick, R., Shill, J., Townsend, B., & Armstrong, F. (2021). Australia in 2030: what is our path to health for all? *Medical Journal of Australia*, *214*(S8), S5–S40. https://doi.org/10.5694/mja2.51020

Badaloni, S., & Rodà, A. (2022). Gender knowledge and Artificial Intelligence. In G. Boella, F. A. D’Asaro, A. Dyoub, & G. Primiero (Eds.), *CEUR Workshop Proceedings* (Vol. 3319, pp. 107–112). CEUR-WS. https://www.scopus.com/inward/record.uri?eid=2-s2.0-85146113018&partnerID=40&md5=654a727e9f1c39c3e85a99de2a786431

Bhawra, J., Skinner, K., Favel, D., Green, B., Coates, K., & Katapally, T. R. (2021). The food equity and environmental data sovereignty (feeds) project: Protocol for a quasi-experimental study evaluating a digital platform for climate change preparedness. *JMIR Research Protocols*, *10*(9). https://doi.org/10.2196/31389

Bogina, V., Hartman, A., Kuflik, T., & Shulner-Tal, A. (2022). Educating Software and AI Stakeholders About Algorithmic Fairness, Accountability, Transparency and Ethics. *International Journal of Artificial Intelligence in Education*, *32*(3), 808–833. https://doi.org/10.1007/s40593-021-00248-0

Bogle, G., Silver, J., Lickerman, E., Li, K., & Murickan, T. (2020). The Future of Artificial Intelligence in Medicine. In *Intelligence-Based Medicine: Artificial Intelligence and Human Cognition in Clinical Medicine and Healthcare* (pp. 431–443). Elsevier. https://doi.org/10.1016/B978-0-12-823337-5.00011-1

Buhmann, A., & Fieseler, C. (2021). Towards a deliberative framework for responsible innovation in artificial intelligence. *Technology in Society*, *64*. https://doi.org/10.1016/j.techsoc.2020.101475

Calo, R. (2018). Artificial intelligence policy: A primer and roadmap. *University of Bologna Law Review*, *3*(2), 180–218. https://doi.org/10.6092/issn.2531-6133/8670

Camaréna, S. (2021). Engaging with artificial intelligence (AI) with a bottom-up approach for the purpose of sustainability: Victorian farmers market association, Melbourne Australia. *Sustainability (Switzerland)*, *13*(16). https://doi.org/10.3390/su13169314

Cantarini, P. (2022). GOVERNANCE OF AI ALGORITHMS-AN APPROACH FROM EPISTEMOLOGIES OF THE SOUTH. *Revista Juridica*, *5*(72), 393–423. https://doi.org/10.26668/revistajur.2316-753X.v5i72.6286

Car, J., Sheikh, A., Wicks, P., & Williams, M. S. (2019). Beyond the hype of big data and artificial intelligence: Building foundations for knowledge and wisdom. *BMC Medicine*, *17*(1). https://doi.org/10.1186/s12916-019-1382-x

Casas-Roma, J., & Conesa, J. (2021). *A literature review on artificial intelligence and ethics in online learning* (pp. 111–131). Elsevier. https://doi.org/10.1016/B978-0-12-823410-5.00006-1

Casillo, M., Cecere, L., Dembele, S. P., Lorusso, A., Santaniello, D., & Valentino, C. (2024). The Metaverse and Revolutionary Perspectives for the Smart Cities of the Future. In X.-S. Yang, S. Sherratt, N. Dey, & A. Joshi (Eds.), *Lecture Notes in Networks and Systems: Vol. 1004 LNNS* (pp. 215–225). Springer Science and Business Media Deutschland GmbH. https://doi.org/10.1007/978-981-97-3305-7_17

Castelli, T., Mocenni, C., & Maria Dimitri, G. (2024). A machine learning approach to assess Sustainable Development Goals food performances: The Italian case. *PLOS ONE*, *19*(1 January). https://doi.org/10.1371/journal.pone.0296465

Cath, C. (2018). Governing artificial intelligence: ethical, legal and technical opportunities and challenges. *Philosophical Transactions of the Royal Society A: Mathematical, Physical and Engineering Sciences*, *376*(2133), 20180080. https://doi.org/10.1098/rsta.2018.0080

Chakraborty, J., Majumder, S., Yu, Z., & Menzies, T. (2020). Fairway: A way to build fair ML software. In P. Devanbu, M. Cohen, & T. Zimmermann (Eds.), *ESEC/FSE 2020 - Proceedings of the 28th ACM Joint Meeting European Software Engineering Conference and Symposium on the Foundations of Software Engineering* (pp. 654–665). Association for Computing Machinery, Inc. https://doi.org/10.1145/3368089.3409697

Chaudhry, M. A., Cukurova, M., & Luckin, R. (2022). A Transparency Index Framework for AI in Education. In M. M. Rodrigo, N. Matsuda, A. I. Cristea, & V. Dimitrova (Eds.), *Lecture Notes in Computer Science: Vol. 13356 LNCS* (pp. 195–198). Springer Science and Business Media Deutschland GmbH. https://doi.org/10.1007/978-3-031-11647-6_33

Cheong, B. C. (2024). Transparency and accountability in AI systems: safeguarding wellbeing in the age of algorithmic decision-making. *Frontiers in Human Dynamics*, *6*. https://doi.org/10.3389/fhumd.2024.1421273

Chu, J., Xi, L., Zhang, Q., & Lin, R. (2022). Research on Ethical Issues of Artificial Intelligence in Education. In *Lecture Notes in Educational Technology* (pp. 101–108). Springer Science and Business Media Deutschland GmbH. https://doi.org/10.1007/978-981-19-5967-7_12

Coghlan, S., Miller, T., & Paterson, J. (2021). Good Proctor or “Big Brother”? Ethics of Online Exam Supervision Technologies. *Philosophy and Technology*, *34*(4), 1581–1606. https://doi.org/10.1007/s13347-021-00476-1

Corredor García, M. P., Quintero Rengifo, E. F., Ariza Ruiz, E. D., & Piñeros, M. I. A. (2021). Methodological Tools Design to Teach Ethics in Accounting According to IFAC IES 4. An Approximation to the Giving Voice to Values (GVV) Methodology. In M. Botto-Tobar, H. Cruz, & A. Díaz Cadena (Eds.), *Advances in Intelligent Systems and Computing: Vol. 1327 AISC* (pp. 17–28). Springer Science and Business Media Deutschland GmbH. https://doi.org/10.1007/978-3-030-68083-1_2

Cowley, B. U., Charles, D., Pfuhl, G., & Rusanen, A.-M. (2022). *Artificial Intelligence in Education as a Rawlsian Massively Multiplayer Game: A Thought Experiment on AI Ethics* (pp. 297–316). Springer International Publishing. https://doi.org/10.1007/978-3-031-09687-7_18

Crawford, K. (2021). Atlas of AI: Power, Politics, and the Planetary Costs of Artificial Intelligence. In *Atlas of AI: Power, Politics, and the Planetary Costs of Artificial Intelligence*. https://doi.org/10.56315/pscf3-22crawford

Currie, G., & Hawk, K. E. (2021). Ethical and Legal Challenges of Artificial Intelligence in Nuclear Medicine. *Seminars in Nuclear Medicine*, *51*(2), 120–125. https://doi.org/10.1053/j.semnuclmed.2020.08.001

de Almeida, P. G. R., Santos, C. D., & Farias, J. S. (2021). Artificial Intelligence Regulation: a framework for governance. *Ethics and Information Technology*, *23*(3), 505–525. https://doi.org/10.1007/s10676-021-09593-z

Dee, E. C., Yu, R. C., Celi, L. A., & Nehal, U. S. (2022). *AIM and Business Models of Healthcare* (pp. 603–611). Springer International Publishing. https://doi.org/10.1007/978-3-030-64573-1_247

Delgado, H. O. K., de Azevedo Fay, A., Sebastiany, M. J., & Silva, A. D. C. (2020). Artificial intelligence adaptive learning tools: the teaching of English in focus. *Brazilian English Language Teaching Journal*, *11*(2). https://doi.org/10.15448/2178-3640.2020.2.38749

Dennehy, D., Griva, A., Pouloudi, N., Dwivedi, Y. K., Dwivedi, Y. K., Pappas, I., Pappas, I., & Mantymaki, M. (Eds.). (2021). 20th IFIP WG 6.11 Conference on e-Business, e-Services and e-Society, I3E 2021. *Lecture Notes in Computer Science*, *12896 LNCS*. https://www.scopus.com/inward/record.uri?eid=2-s2.0-85115191822&partnerID=40&md5=dd33c6f1dc80f55f3f9baa7b5865bb76

Denton, E., Hanna, A., Amironesei, R., Smart, A., & Nicole, H. (2021). On the genealogy of machine learning datasets: A critical history of ImageNet. *Big Data and Society*, *8*(2). https://doi.org/10.1177/20539517211035955

Desai, K., Yadav, S., & Murugan, R. (2024). *Exploring the Theoretical Dimensions and Intricate Behaviors of Large Language Models and their Multimodal Counterparts* (G. S. Tomar (Ed.); pp. 670–677). Institute of Electrical and Electronics Engineers Inc. https://doi.org/10.1109/CSNT60213.2024.10545720

El Bilali, H., Bottalico, F., Ottomano Palmisano, G., & Capone, R. (2020). Information and communication technologies for smart and sustainable agriculture. In M. Brka, E. Omanovic-Miklicanin, L. Karic, V. Falan, & A. Toroman (Eds.), *IFMBE Proceedings* (Vol. 78, pp. 321–334). Springer. https://doi.org/10.1007/978-3-030-40049-1_41

Erman, E., & Furendal, M. (2022). The Global Governance of Artificial Intelligence: Some Normative Concerns. *Moral Philosophy and Politics*, *9*(2), 267–291. https://doi.org/10.1515/mopp-2020-0046

Ess, C., Kreps, D., Kimppa, K., & Leenen, L. (Eds.). (2018). 13th IFIP TC 9 International Conference on Human Choice and Computers, HCC 2018 Held at the 24th IFIP World Computer Congress, WCC 2018. *IFIP Advances in Information and Communication Technology*, *537*. https://www.scopus.com/inward/record.uri?eid=2-s2.0-85053888611&partnerID=40&md5=bb8edacf59336970cb7a84e8f049db24

Fjeld, J., Nagy, A., Hilligoss, H., Achten, N., & Srikumar, M. (2020). Principled Artificial Intelligence: Mapping Consensus in Ethical and Rights-Based Approaches to Principles for AI. *SSRN Electronic Journal*. https://doi.org/10.2139/ssrn.3518482

Floridi, L., Cowls, J., Beltrametti, M., Chatila, R., Chazerand, P., Dignum, V., Luetge, C., Madelin, R., Pagallo, U., Rossi, F., Schafer, B., Valcke, P., & Vayena, E. (2018). AI4People—An Ethical Framework for a Good AI Society: Opportunities, Risks, Principles, and Recommendations. *Minds and Machines*, *28*(4), 689–707. https://doi.org/10.1007/s11023-018-9482-5

Frischknecht-Gruber, C. M.-L., Reif, M., & Senn, C. W. (2022). *Global Efforts Towards Establishing Safety Directives for Intelligent Systems: Review* (M. C. Leva, E. Patelli, L. Podofillini, & S. Wilson (Eds.); pp. 2420–2427). Research Publishing. https://doi.org/10.3850/978-981-18-5183-4_S11-11-472-cd

Garcia, A. R. (2020). AI, IoT, Big Data, and Technologies in Digital Economy with Blockchain at Sustainable Work Satisfaction to Smart Mankind: Access to 6th Dimension of Human Rights. In *EAI/Springer Innovations in Communication and Computing* (pp. 83–131). Springer Science and Business Media Deutschland GmbH info@springer-sbm.com. https://doi.org/10.1007/978-3-030-22070-9_6

Gibbons, E. D. (2021). Toward a More Equal World: The Human Rights Approach to Extending the Benefits of Artificial Intelligence. *IEEE Technology and Society Magazine*, *40*(1), 25–30. https://doi.org/10.1109/MTS.2021.3056295

Godwin-Jones, R. (2021). Big Data and Language Learning: Opportunities and Challenges. *Language Learning and Technology*, *25*(1), 4–19. https://www.scopus.com/inward/record.uri?eid=2-s2.0-85110034106&partnerID=40&md5=e3f78633be7b1c6308ce85f8a9a20f49

Gorur, R., Hoon, L., & Kowal, E. (2020). Computer science ethics education in Australia - A work in progress. In H. Mitsuhara, Y. Goda, Y. Ohashi, M. M. T. Rodrigo, J. Shen, N. Venkatarayalu, G. Wong, M. Yamada, & L. Chi-Un Lei (Eds.), *Proceedings of 2020 IEEE International Conference on Teaching, Assessment, and Learning for Engineering, TALE 2020* (pp. 945–947). Institute of Electrical and Electronics Engineers Inc. https://doi.org/10.1109/TALE48869.2020.9368375

Gorwa, R., Binns, R., & Katzenbach, C. (2020). Algorithmic content moderation: Technical and political challenges in the automation of platform governance. *Big Data and Society*, *7*(1). https://doi.org/10.1177/2053951719897945

Greene, S. J., Fonarow, G. C., DeVore, A. D., Sharma, P. P., Vaduganathan, M., Albert, N. M., Duffy, C. I., Hill, C. L., McCague, K., Patterson, J. H., Spertus, J. A., Thomas, L., Williams, F. B., Hernandez, A. F., & Butler, J. (2019). Titration of Medical Therapy for Heart Failure With Reduced Ejection Fraction. *Journal of the American College of Cardiology*, *73*(19), 2365–2383. https://doi.org/10.1016/j.jacc.2019.02.015

Gutierrez, S. S. M., Perez, S. L., & Munguia, M. G. (2022). Artificial Intelligence in e-Learning Plausible Scenarios in Latin America and New Graduation Competencies. *Revista Iberoamericana de Tecnologias Del Aprendizaje*, *17*(1), 31–40. https://doi.org/10.1109/RITA.2022.3149833

Gutierrez Y Restrepo, E., & Floris, C. (2022). *Supporting Teachers and Students Through a Smart Integrated System for Truly Inclusive Higher Education*. 107–113. https://doi.org/10.1145/3563137.3563173

Hagendorff, T. (2020). The Ethics of AI Ethics: An Evaluation of Guidelines. *Minds and Machines*, *30*(1), 99–120. https://doi.org/10.1007/s11023-020-09517-8

Hainaut, P., Zatloukal, K., Vaught, J., & Pasterk, M. (2021). *Biobanking of Human Biospecimens: Lessons from 25 Years of Biobanking Experience, Second Edition*. Springer International Publishing. https://doi.org/10.1007/978-3-030-55901-4

Helberger, N., Araujo, T., & de Vreese, C. H. (2020). Who is the fairest of them all? Public attitudes and expectations regarding automated decision-making. *Computer Law and Security Review*, *39*. https://doi.org/10.1016/j.clsr.2020.105456

Hickman, E., & Petrin, M. (2021). Trustworthy AI and Corporate Governance: The EU’s Ethics Guidelines for Trustworthy Artificial Intelligence from a Company Law Perspective. *European Business Organization Law Review*, *22*(4), 593–625. https://doi.org/10.1007/s40804-021-00224-0

Hine, C. (2021). Evaluating the prospects for university-based ethical governance in artificial intelligence and data-driven innovation. *Research Ethics*, *17*(4), 464–479. https://doi.org/10.1177/17470161211022790

Hine, C., Nilforooshan, R., & Barnaghi, P. (2022). Ethical considerations in design and implementation of home-based smart care for dementia. *Nursing Ethics*, *29*(4), 1035–1046. https://doi.org/10.1177/09697330211062980

Holzmeyer, C. (2021). Beyond ‘AI for Social Good’ (AI4SG): social transformations—not tech-fixes—for health equity. *Interdisciplinary Science Reviews*, *46*(1–2), 94–125. https://doi.org/10.1080/03080188.2020.1840221

International Commission on the Futures of Education. (2021). Reimagining our futures together: a new social contract for education. In *Reimagining our futures together: a new social contract for education*. United Nations Educational, Scientific and Cultural Organization. https://doi.org/10.54675/asrb4722

Jeremy Pitt, J., DIaconescu, A., & Ober, J. (2019). Knowledge Management for Democratic Governance of Socio-Technical Systems. In *Lecture Notes in Computer Science: Vol. 11300 LNCS* (pp. 38–61). Springer Verlag service@springer.de. https://doi.org/10.1007/978-3-030-05333-8_4

Jobin, A., Ienca, M., & Vayena, E. (2019). The global landscape of AI ethics guidelines. *Nature Machine Intelligence*, *1*(9), 389–399. https://doi.org/10.1038/s42256-019-0088-2

Karatzogianni, A. (2021). Research design for an integrated Artificial Intelligence ethical framework. *Monitoring Obshchestvennogo Mneniya: Ekonomicheskie i Sotsial’nye Peremeny*, *1*, 31–45. https://doi.org/10.14515/MONITORING.2021.1.1911

Kästner, C., & Kang, E. (2020). Teaching software engineering for AI-enabled systems. *Proceedings - International Conference on Software Engineering*, 45–48. https://doi.org/10.1145/3377814.3381714

Keeble, J., & Blatchly-Lewis, M. (2022). *The responsible city* (pp. 139–154). Wiley Blackwell. https://doi.org/10.1002/9781119746294.ch8

Keller, T., Moser, M., & Bossi, H. (2024). *DIGITAL LEGACY IN A DIGITAL WORLD* (P. Isaias, P. Isaias, P. Miranda, & P. Kommers (Eds.); pp. 139–147). IADIS. https://www.scopus.com/inward/record.uri?eid=2-s2.0-85207078843&partnerID=40&md5=31ce32670af08366c355f347e20b20b5

Khoury, P., Srinivasan, R., Kakumanu, S., Ochoa, S., Keswani, A., Sparks, R., & Rider, N. L. (2022). A Framework for Augmented Intelligence in Allergy and Immunology Practice and Research—A Work Group Report of the AAAAI Health Informatics, Technology, and Education Committee. *Journal of Allergy and Clinical Immunology: In Practice*, *10*(5), 1178–1188. https://doi.org/10.1016/j.jaip.2022.01.047

Kim, E., Bryant, D., Srikanth, D., & Howard, A. (2021). *Age Bias in Emotion Detection: An Analysis of Facial Emotion Recognition Performance on Young, Middle-Aged, and Older Adults*. 638–644. https://doi.org/10.1145/3461702.3462609

Kiritchenko, S., Nejadgholi, I., & Fraser, K. C. (2021). Confronting abusive language online: A survey from the ethical and human rights perspective. *Journal of Artificial Intelligence Research*, *71*, 431–478. https://doi.org/10.1613/JAIR.1.12590

Klerkx, L., & Rose, D. (2020). Dealing with the game-changing technologies of Agriculture 4.0: How do we manage diversity and responsibility in food system transition pathways? *Global Food Security*, *24*. https://doi.org/10.1016/j.gfs.2019.100347

Lee, J. (2020). Access to Finance for Artificial Intelligence Regulation in the Financial Services Industry. *European Business Organization Law Review*, *21*(4), 731–757. https://doi.org/10.1007/s40804-020-00200-0

Leslie, D. (2019). *Understanding artificial intelligence ethics and safety*. https://doi.org/10.5281/zenodo.3240529

Li, Y., Li, S., & Wang, L. (2021). *The integration development of artificial intelligence and education*. 994–997. https://doi.org/10.1109/ICCSE51940.2021.9569551

Lo Piano, S. (2020). Ethical principles in machine learning and artificial intelligence: cases from the field and possible ways forward. *Humanities and Social Sciences Communications*, *7*(1). https://doi.org/10.1057/s41599-020-0501-9

Lodders, A., & Paterson, J. M. (2020). Scrutinising COVIDSafe: Frameworks for evaluating digital contact tracing technologies. *Alternative Law Journal*, *45*(3), 153–161. https://doi.org/10.1177/1037969X20948262

Losavio, M. (2021). Algorithms of Machines and Law: Risks in Pattern Recognition, Machine Learning and Artificial Intelligence for Justice and Fairness. *Public Governance, Administration and Finances Law Review*, *6*(2), 21–34. https://doi.org/10.53116/pgaflr.2021.2.3

Luetge, C., Poszler, F., Acosta, A. J., Danks, D., Gottehrer, G., Mihet-Popa, L., & Naseer, A. (2021). AI4people: Ethical guidelines for the automotive sector-fundamental requirements and practical recommendations. *International Journal of Technoethics*, *12*(1), 101–125. https://doi.org/10.4018/IJT.20210101.oa2

MacKay, S., & Swenson, J. (2022). Investigating the Connection Between Sense of Belonging and Academic Dishonesty. *Proceedings - Frontiers in Education Conference, FIE*, *2022*-*Octob*. https://doi.org/10.1109/FIE56618.2022.9962730

Madril, D. (2020). Access Denied. *International Symposium on Technology and Society, Proceedings*, *2020*-*Novem*, 124–127. https://doi.org/10.1109/ISTAS50296.2020.9462190

McDonald, N., & Pan, S. (2020). Intersectional AI: A Study of How Information Science Students Think about Ethics and Their Impact. *Proceedings of the ACM on Human-Computer Interaction*, *4*(CSCW2). https://doi.org/10.1145/3415218

McKay, F., Williams, B. J., Prestwich, G., Bansal, D., Hallowell, N., & Treanor, D. (2022). The ethical challenges of artificial intelligence-driven digital pathology. *Journal of Pathology: Clinical Research*, *8*(3), 209–216. https://doi.org/10.1002/cjp2.263

Mikhaylova, I. V, Petrova, M. A., & Bakulina, E. D. (2021). Digital transformation of chess training. *Teoriya i Praktika Fizicheskoy Kultury*, *2021*(1), 102–104. https://www.scopus.com/inward/record.uri?eid=2-s2.0-85103673553&partnerID=40&md5=83dc04319439d74b8ffca462c909e345

Mittelstadt, B. (2021). Interpretability and transparency in artificial intelligence. *Oxford Handbook of Digital Ethics*, 378–409. https://doi.org/10.1093/oxfordhb/9780198857815.013.20

Nah, F. F., & Siau, K. (Eds.). (2021). 8th International Conference on HCI in Business, Government and Organizations, HCIBGO 2021, Held as Part of the 23rd HCI International Conference, HCII 2021. *Lecture Notes in Computer Science*, *12783 LNCS*. https://www.scopus.com/inward/record.uri?eid=2-s2.0-85112233382&partnerID=40&md5=e0849d82d1f88c4b8dce4e2c44318c14

OECD. (2019). Trends Shaping Education 2019 |ONLINE. In *OECD Publishing, Paris*. OECD. https://doi.org/10.1787/trends_edu-2019-en

OECD. (2022). *OECD, Recommendation of the Council on Artificial Intelligence, OECD/LEGAL/0449*. http://legalinstruments.oecd.org

OECD. (2024). *OECD AI Principles overview*. Principles for Trustworthy AI. https://oecd.ai/en/ai-principles

Paic, A. (2019). Policies for artificial intelligence in science and innovation. *Proceedings of Science*, *372*. https://www.scopus.com/inward/record.uri?eid=2-s2.0-85101244456&partnerID=40&md5=9a320da7b8f618b5b7a690bd0f6e2fee

Pandey, A., & Caliskan, A. (2021). *Disparate Impact of Artificial Intelligence Bias in Ridehailing Economy’s Price Discrimination Algorithms*. 822–833. https://doi.org/10.1145/3461702.3462561

Phillips, A. M., & Mian, I. S. (2019). Governance and Assessment of Future Spaces: A Discussion of Some Issues Raised by the Possibilities of Human–Machine Mergers. *Development*, *62*(1–4), 66–80. https://doi.org/10.1057/s41301-019-00208-1

Price, W. N., & Cohen, I. G. (2019). Privacy in the age of medical big data. *Nature Medicine*, *25*(1), 37–43. https://doi.org/10.1038/s41591-018-0272-7

Quintarelli, S., Corea, F., Fossa, F., Loreggia, A., & Sapienza, S. (2019). An ethical perspective on Artificial Intelligence: Principles, rights and recommendations. *BioLaw Journal*, *2019*(3), 159–177. https://www.scopus.com/inward/record.uri?eid=2-s2.0-85076747870&partnerID=40&md5=172a056fd62193b3da914c7884429a60

Rajagopal, N. K., Anand, M., & Mohanty, S. (2024). Exploring Machine Learning Applications in Human Resources Management: A Comprehensive Review. In *Studies in Systems, Decision and Control* (Vol. 569, pp. 303–313). Springer Science and Business Media Deutschland GmbH. https://doi.org/10.1007/978-3-031-71649-2_26

Richardson, B., Prioleau, D., Alikhademi, K., & Gilbert, J. E. (2020). Public Accountability: Understanding Sentiments towards Artificial Intelligence across Dispositional Identities. *International Symposium on Technology and Society, Proceedings*, *2020*-*Novem*, 489–496. https://doi.org/10.1109/ISTAS50296.2020.9462184

Riel, J. (2020). Essential features and critical issues with educational chatbots: Toward personalized learning via digital agents. In *Handbook of Research on Modern Educational Technologies, Applications, and Management (2 Vol.)* (pp. 246–262). IGI Global. https://doi.org/10.4018/978-1-7998-3476-2.ch015

Robert, L. P., Bansal, G., & Luetge, C. (2020). ICIS 2019 SIGHCI Workshop Panel Report: Human– Computer Interaction Challenges and Opportunities for Fair, Trustworthy and Ethical Artificial Intelligence. *AIS Transactions on Human-Computer Interaction*, *12*(2), 96–108. https://doi.org/10.17705/1thci.00130

Rocco, R., Thomas, A., & Novas-Ferradás, M. (2022). *Teaching design for values: Concepts, tools & practices*. TU Delft. https://doi.org/10.34641/mg.54

Ryan, M., & Stahl, B. C. (2021). Artificial intelligence ethics guidelines for developers and users: clarifying their content and normative implications. *Journal of Information, Communication and Ethics in Society*, *19*(1), 61–86. https://doi.org/10.1108/JICES-12-2019-0138

Sapienza, S. (2022). Current Trends, Machine Learning, and Food Safety Data Governance. In *Law, Governance and Technology Series* (Vol. 52, pp. 123–160). Springer Nature. https://doi.org/10.1007/978-3-031-09367-8_4

Schiff, D., Rakova, B., Ayesh, A., Fanti, A., & Lennon, M. (2021). Explaining the Principles to Practices Gap in AI. *IEEE Technology and Society Magazine*, *40*(2), 81–94. https://doi.org/10.1109/MTS.2021.3056286

Schiff, D. S., Laas, K., Biddle, J. B., & Borenstein, J. (2022). Global AI Ethics Documents: What They Reveal About Motivations, Practices, and Policies. In *International Library of Ethics, Law and Technology* (Vol. 23, pp. 121–143). Springer Science and Business Media B.V. https://doi.org/10.1007/978-3-030-86201-5_7

Schoenherr, J. R. (2021). Designing Ethical Agency for Adaptive Instructional Systems: The FATE of Learning and Assessment. In R. A. Sottilare & J. Schwarz (Eds.), *Lecture Notes in Computer Science: Vol. 12792 LNCS* (pp. 265–283). Springer Science and Business Media Deutschland GmbH. https://doi.org/10.1007/978-3-030-77857-6_18

Sharma, S., Rawal, Y. S., Pal, S., & Dani, R. (2022). Fairness, Accountability, Sustainability, Transparency (FAST) of Artificial Intelligence in Terms of Hospitality Industry. In S. Fong, N. Dey, & A. Joshi (Eds.), *Lecture Notes in Networks and Systems* (Vol. 314, pp. 495–504). Springer Science and Business Media Deutschland GmbH. https://doi.org/10.1007/978-981-16-5655-2_48

Shin, D. D. (2019). Toward Fair, Accountable, and Transparent Algorithms: Case Studies on Algorithm Initiatives in Korea and China. *Javnost*, *26*(3), 274–290. https://doi.org/10.1080/13183222.2019.1589249

Shneiderman, B. (2020). Bridging the gap between ethics and practice: Guidelines for reliable, safe, and trustworthy human-centered AI systems. *ACM Transactions on Interactive Intelligent Systems*, *10*(4). https://doi.org/10.1145/3419764

Siala, H., & Wang, Y. (2022). SHIFTing artificial intelligence to be responsible in healthcare: A systematic review. *Social Science and Medicine*, *296*. https://doi.org/10.1016/j.socscimed.2022.114782

Sijing, L., & Lan, W. (2018). Artificial intelligence education ethical problems and solutions. *13th International Conference on Computer Science and Education, ICCSE 2018*, 155–158. https://doi.org/10.1109/ICCSE.2018.8468773

Sjödén, B. (2020). When Lying, Hiding and Deceiving Promotes Learning - A Case for Augmented Intelligence with Augmented Ethics. In I. I. Bittencourt, M. Cukurova, R. Luckin, K. Muldner, & E. Millán (Eds.), *Lecture Notes in Computer Science: Vol. 12164 LNAI* (pp. 291–295). Springer. https://doi.org/10.1007/978-3-030-52240-7_53

Smith, C. H., Molka-Danielsen, J., & Rasool, J. (2020). Transforming TEL for human flourishing: Learning Enhanced Technology (LET). In H. Mitsuhara, Y. Goda, Y. Ohashi, M. M. T. Rodrigo, J. Shen, N. Venkatarayalu, G. Wong, M. Yamada, & L. Chi-Un Lei (Eds.), *Proceedings of 2020 IEEE International Conference on Teaching, Assessment, and Learning for Engineering, TALE 2020* (pp. 900–905). Institute of Electrical and Electronics Engineers Inc. https://doi.org/10.1109/TALE48869.2020.9368488

Soma, T., & Nuckchady, B. (2021). Communicating the Benefits and Risks of Digital Agriculture Technologies: Perspectives on the Future of Digital Agricultural Education and Training. *Frontiers in Communication*, *6*. https://doi.org/10.3389/fcomm.2021.762201

Spiegel, J. M., Wilkinson, J., Ehrlich, R., Lockhart, K., Yassi, A., Barker, S., Riera, F., & Kistnasamy, B. (2021). Using artificial intelligence for high-volume identification of silicosis and tuberculosis a bio-ethics approach. *Annals of Global Health*, *87*(1). https://doi.org/10.5334/aogh.3206

Starke, G., de Clercq, E., & Elger, B. S. (2021). Towards a pragmatist dealing with algorithmic bias in medical machine learning. *Medicine, Health Care and Philosophy*, *24*(3), 341–349. https://doi.org/10.1007/s11019-021-10008-5

Steels, L., & De Mantaras, R. L. (2018). The Barcelona declaration for the proper development and usage of artificial intelligence in Europe. *AI Communications*, *31*(6), 485–494. https://doi.org/10.3233/AIC-180607

Su, A. (2022). The Promise and Perils of International Human Rights Law for AI Governance. *Law, Technology and Humans*, *4*(1). https://doi.org/10.5204/LTHJ.2332

Tsafack Chetsa, G. L. T. (2021). *Towards sustainable artificial intelligence: A framework to create value and understand risk*. Apress Media LLC. https://doi.org/10.1007/978-1-4842-7214-5

Tsamados, A., Aggarwal, N., Cowls, J., Morley, J., Roberts, H., Taddeo, M., & Floridi, L. (2021). The Ethics of Algorithms: Key Problems and Solutions. In *Philosophical Studies Series* (Vol. 144, pp. 97–123). Springer Nature. https://doi.org/10.1007/978-3-030-81907-1_8

Ulnicane, I., Eke, D. O., Knight, W., Ogoh, G., & Stahl, B. C. (2021). Good governance as a response to discontents? Déjà vu, or lessons for AI from other emerging technologies. *Interdisciplinary Science Reviews*, *46*(1–2), 71–93. https://doi.org/10.1080/03080188.2020.1840220

UNESCO. (2021a). AI and education: guidance for policy-makers. In *AI and education: guidance for policy-makers*. UNESCO Publishing. https://doi.org/10.54675/pcsp7350

UNESCO. (2021b). *Publications* (Vol. 17). http://unesdoc.unesco.org/

UNESCO. (2023). Key Facts UNESCO’s Recommendation on the Ethics of Artificial Intelligence. In *United Nations Educational, Scientific and Cultural Organization*.

Van Schalkwyk, M. C., Maani, N., Cohen, J., McKee, M., & Petticrew, M. (2021). Our Postpandemic World: What Will It Take to Build a Better Future for People and Planet? *Milbank Quarterly*, *99*(2), 467–502. https://doi.org/10.1111/1468-0009.12508

Vertadier, H. (2020). Legal and ethical framework for robots and Ai - Using space settlements as a case study. *Proceedings of the International Astronautical Congress, IAC*, *2020*-*Octob*. https://www.scopus.com/inward/record.uri?eid=2-s2.0-85100940112&partnerID=40&md5=6e3837d6895f669c921b0d257a7ac656

Vieweg, S. H. (2021). Business Ethics. In *Management for Professionals: Vol. Part F454* (pp. 39–53). Springer Nature. https://doi.org/10.1007/978-3-030-66913-3_3

Vorontsova, Y., Gil Martínez, M. A., Arakelyan, A., & Yeremyan, A. (2021). Pedagogical challenges of transhumanism: Possible threats in the context of digitalization. *Wisdom*, *17*(1), 162–168. https://doi.org/10.24234/wisdom.v17i1.453

Walsh, B., Dalton, B., Forsyth, S., Haberl, E., Smilack, J., Yeh, T., Zhang, H., Lee, I., Lin, G. C., & Kim, Y. J. (2022). Aspiring for Equity: Perspectives from Design of AI Education. In C. Chinn, E. Tan, C. Chan, & Y. Kali (Eds.), *Proceedings of International Conference of the Learning Sciences, ICLS* (pp. 1771–1778). International Society of the Learning Sciences (ISLS). https://www.scopus.com/inward/record.uri?eid=2-s2.0-85145776572&partnerID=40&md5=6e8d76bbaa4ecaa69343c7feebb164c5

Wang, Y.-X., Wang, C.-H., Zhang, J.-Y., Xu, M.-H., Peng, Z.-H., Nie, Y., & Kang, G.-J. (2022). Positive role and ethical problems of artificial intelligence in ophthalmology. *International Eye Science*, *22*(6), 1020–1024. https://doi.org/10.3980/j.issn.1672-5123.2022.6.27

Weber-Lewerenz, B. (2021). Corporate digital responsibility (CDR) in construction engineering—ethical guidelines for the application of digital transformation and artificial intelligence (AI) in user practice. *SN Applied Sciences*, *3*(10). https://doi.org/10.1007/s42452-021-04776-1

Weber, C. (2019). Engineering Bias in AI. *IEEE Pulse*, *10*(1), 15–17. https://doi.org/10.1109/MPULS.2018.2885857

Whittlestone, J., Nyrup, R., Alexandrova, A., & Cave, S. (2019). The Role and Limits of Principles in AI Ethics. *Proceedings of the 2019 AAAI/ACM Conference on AI, Ethics, and Society*, 195–200. https://doi.org/10.1145/3306618.3314289

Wu, W., Huang, T., & Gong, K. (2020). Ethical Principles and Governance Technology Development of AI in China. *Engineering*, *6*(3), 302–309. https://doi.org/10.1016/j.eng.2019.12.015

Wu, Z., Ji, D., Yu, K., Zeng, X., Wu, D., & Shidujaman, M. (2021). AI Creativity and the Human-AI Co-creation Model. In M. Kurosu (Ed.), *Lecture Notes in Computer Science: Vol. 12762 LNCS* (pp. 171–190). Springer Science and Business Media Deutschland GmbH. https://doi.org/10.1007/978-3-030-78462-1_13

Xu, L. (2020). The Dilemma and Countermeasures of AI in Educational Application. *ACM International Conference Proceeding Series*, 289–294. https://doi.org/10.1145/3445815.3445863

Yigitcanlar, T., Mehmood, R., & Corchado Rodríguez, J. M. (2021). Green artificial intelligence: towards an efficient, sustainable and equitable technology for smart cities and futures. *Sustainability (Switzerland)*, *13*(16). https://doi.org/10.3390/su13168952

Zdravkova, K. (2022). The Potential of Artificial Intelligence for Assistive Technology in Education. In *Learning and Analytics in Intelligent Systems* (Vol. 29, pp. 61–85). Springer Nature. https://doi.org/10.1007/978-3-031-04662-9_4
