# Supplementary material for: Ethical and Inclusive Artificial Intelligence for Sustainable Knowledge Societies: A Global Governance Framework through a Systematic Literature Review
Source: Research Square preprint supplement (doi:10.21203/rs.3.rs-8230657/v1), 2025-12-24
Supplement: Supplementary file 2 [file c2f490c8a579b4b9f93e17e1.docx]

## **Figure 1**. Theoretical–Analytical Framework Integrating Ethical AI, Strategic Knowledge Governance, and Sustainable Value Creation (Theoretical–Analytical Framework underpinning SEG-F (Figure 4).


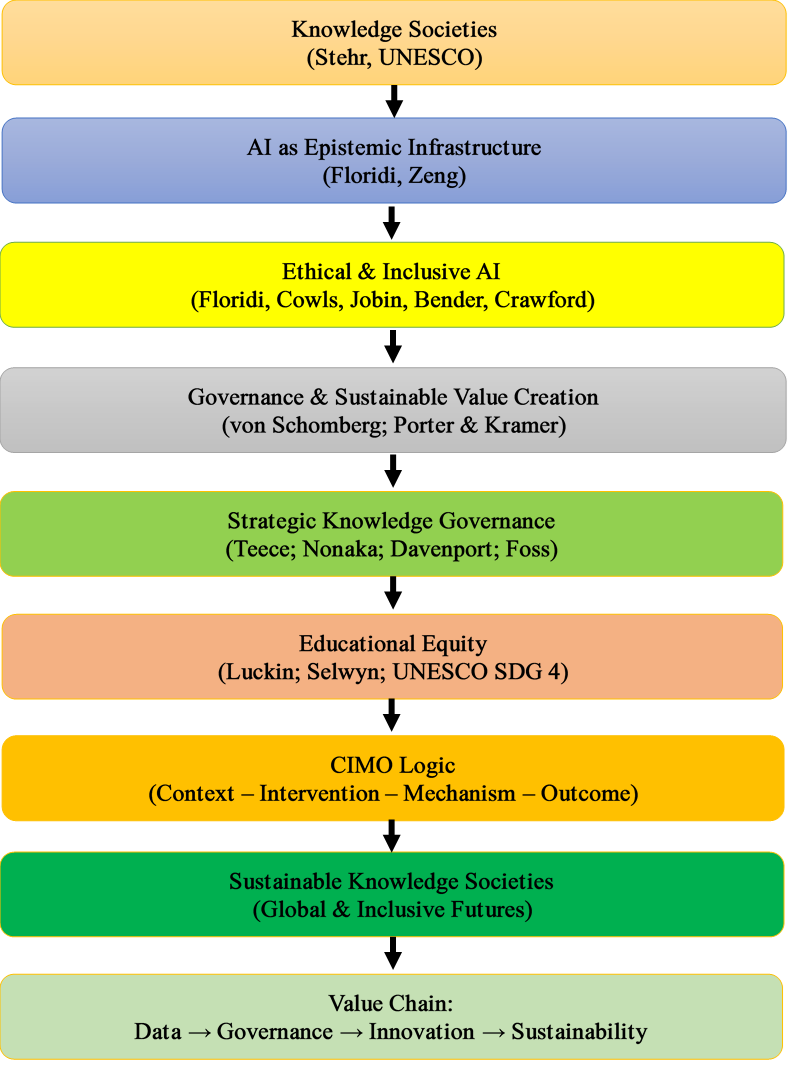


## **Figure 2.** Studies Design Flow: PICo–PRISMA–CIMO Framework


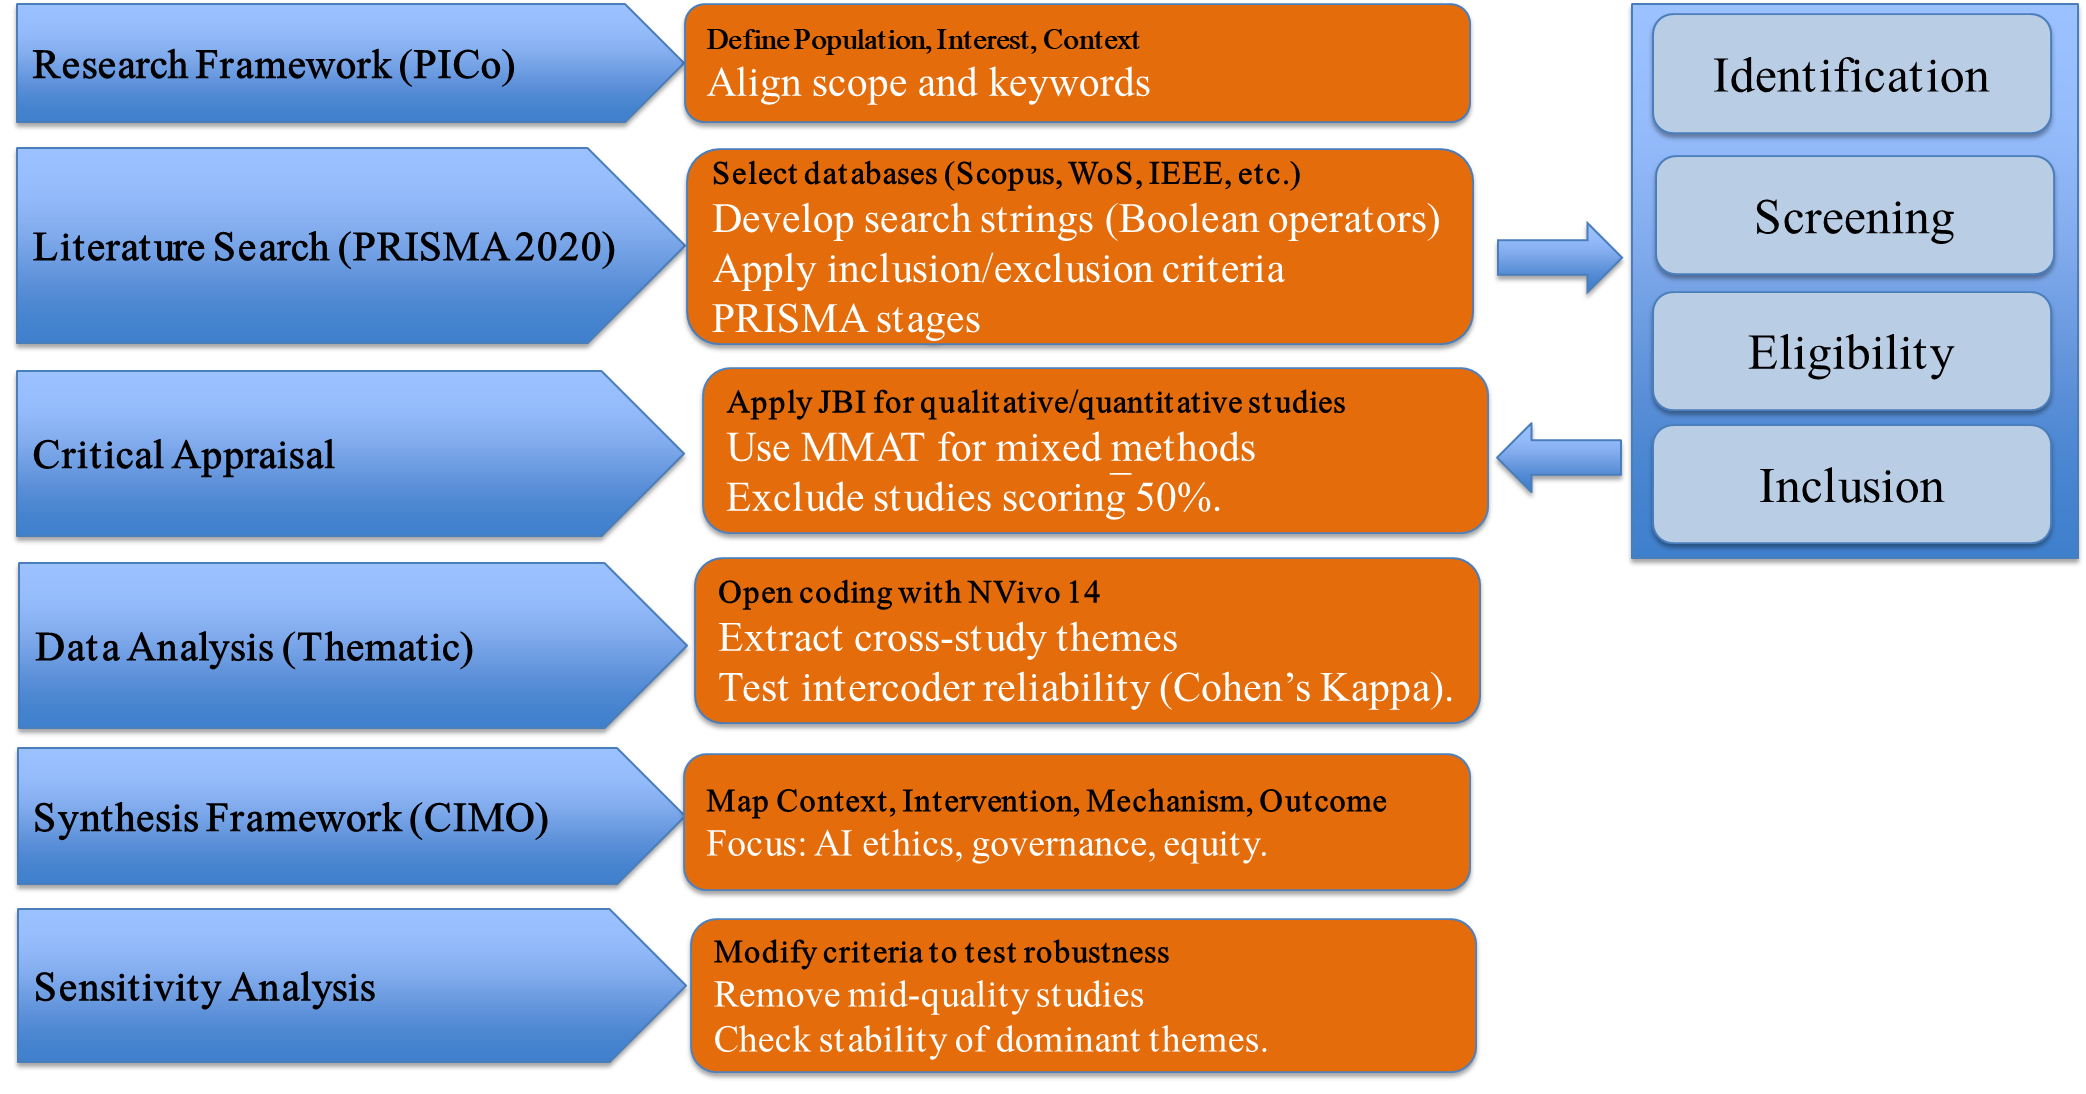


## **Figure 3*.*** PRISMA Flow diagram.


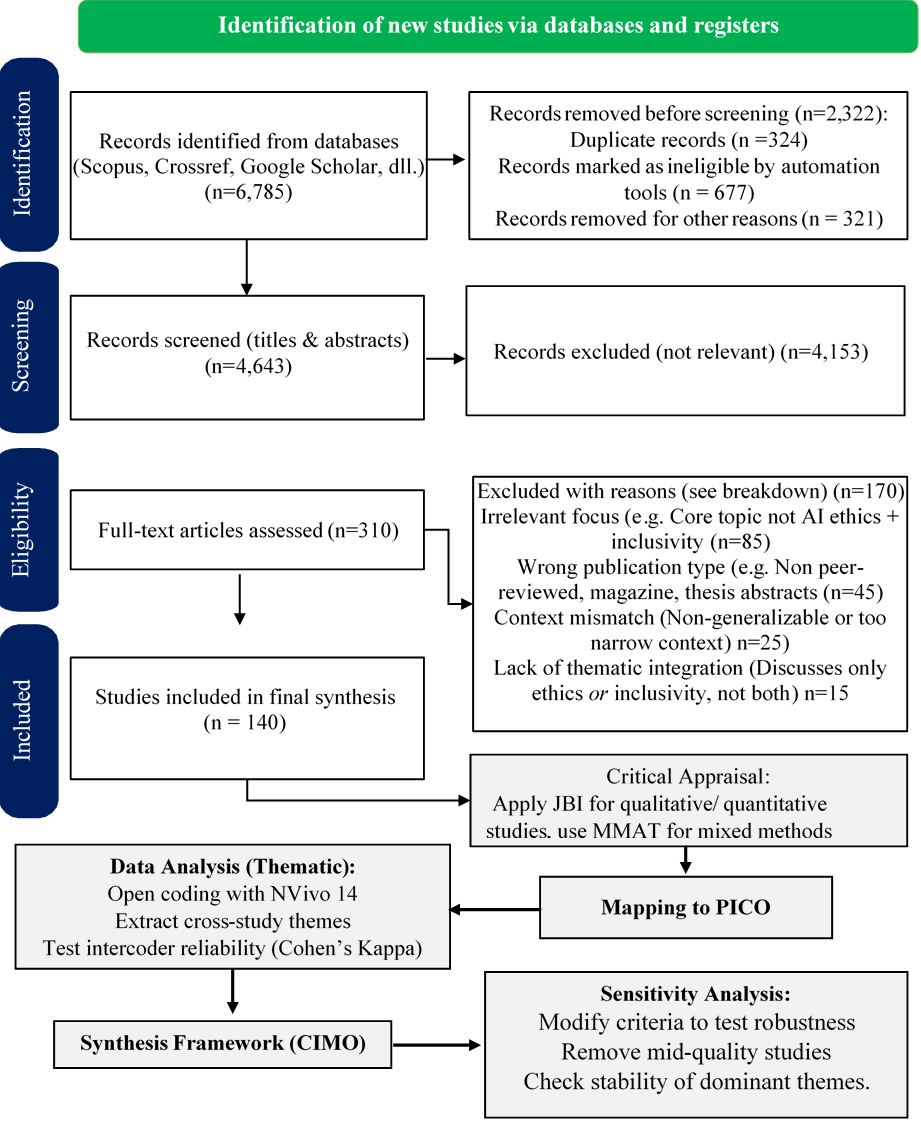


## Figure 4. Strategic Ethical Governance Framework (SEG-F): Integrating Knowledge, Ethics, and Innovation toward Sustainable Value Creation.


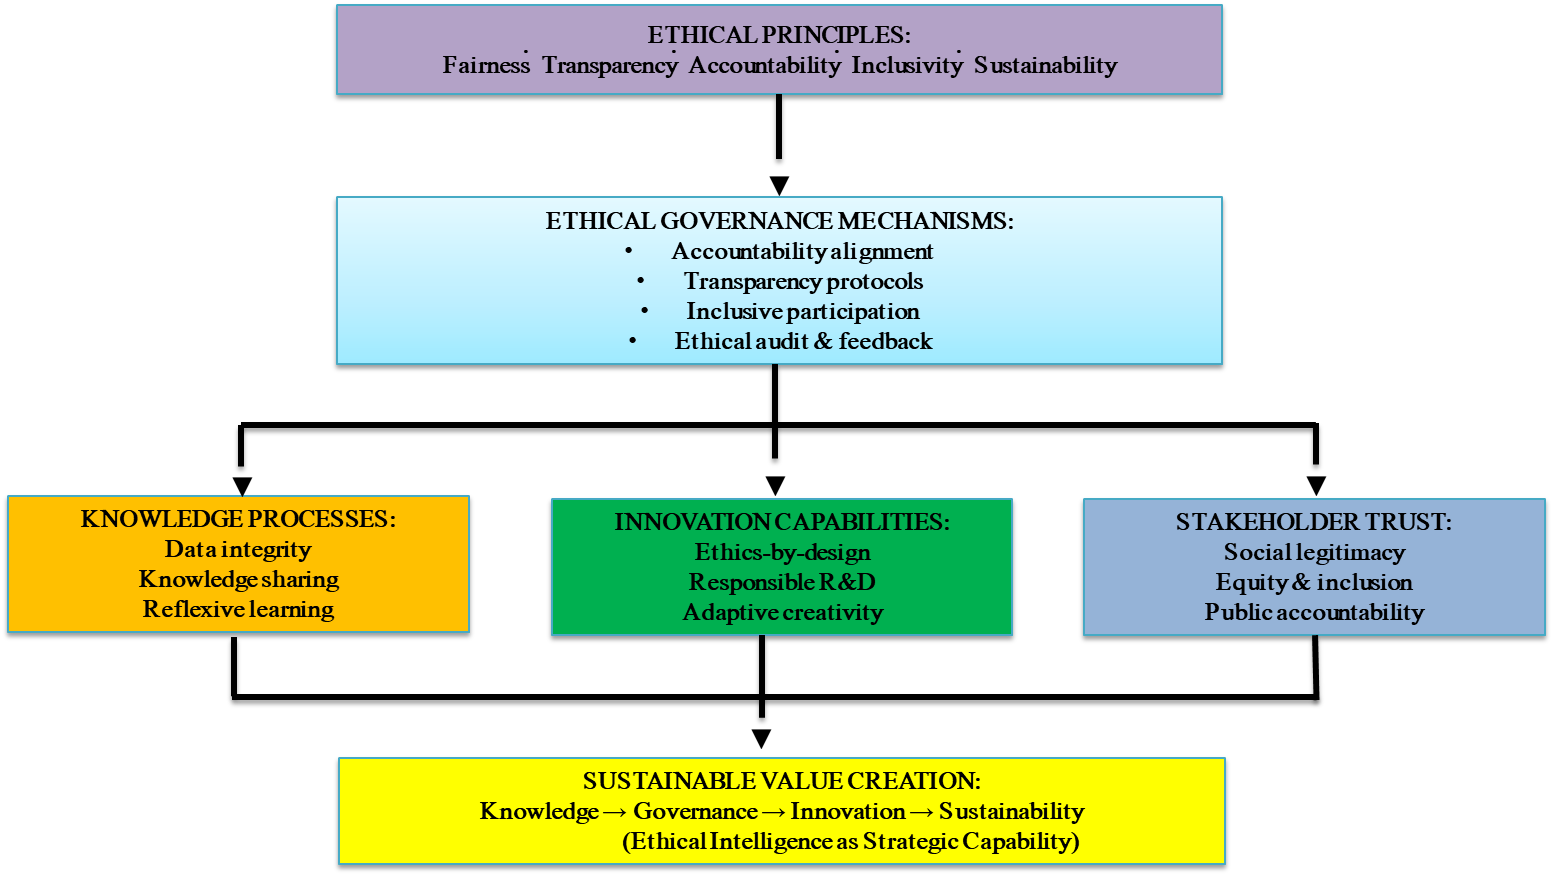


**Figure 4.** The Strategic Ethical Governance Framework (SEG-F) synthesizes the study’s thematic results into a dynamic model connecting ethical principles, governance mechanisms, organizational integration, and sustainability outcomes.
The framework illustrates how four interdependent mechanisms—**Transparency–Trust, Accountability–Alignment, Inclusivity–Capability,** and **Sustainability–Value Creation**—form a continuous governance cycle. This cycle links **ethical AI** with **strategic knowledge management**, enabling organizations to transform compliance obligations into **innovation capacity** and **long-term societal value**.
By embedding these mechanisms into the knowledge–governance–innovation–value continuum, SEG-F positions ethical AI as both a managerial capability and a strategic resource for sustainable knowledge societies.


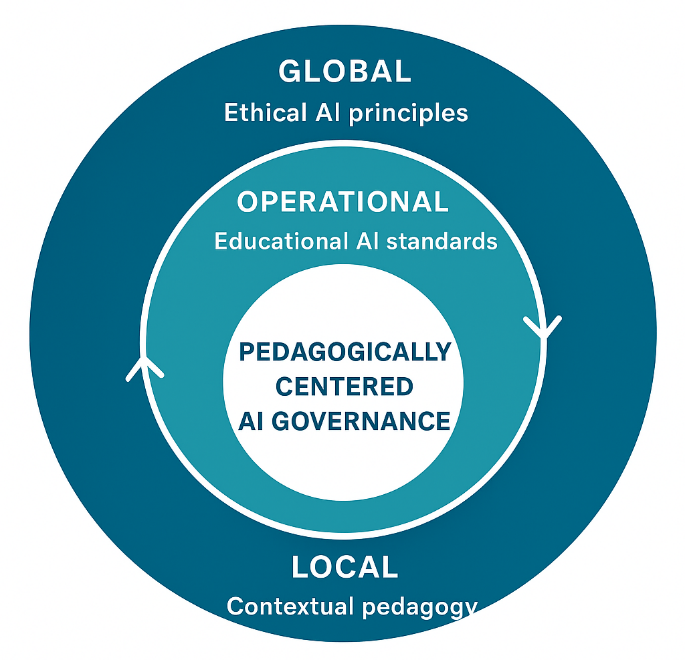


### **Figure 5. Integrated Framework: From Pedagogically-Centred AI Governance (PCAG) to Sustainable Educational Governance Framework (SEG-F)**

This integrative model illustrates the continuum between pedagogical micro-level governance and global macro-level coherence in ethical AI for education. The Pedagogically-Centred AI Governance (PCAG) model anchors ethics within teaching, learning, and capacity-building processes, positioning pedagogy as the operational core of ethical inclusion. These pedagogical mechanisms feed into the Sustainable Educational Governance Framework (SEG-F), which aligns technical, regulatory, and participatory infrastructures across global, sectoral, and local levels. Together, the two frameworks form a dynamic governance learning system that operationalises Floridi’s concept of the infosphere and Sen’s capability approach—transforming ethical AI from normative abstraction into an actionable architecture for sustainable knowledge societies.
